# Supplementary material for: Haplotype Analysis of BADH1 by Next-Generation Sequencing Reveals Association with Salt Tolerance in Rice during Domestication
Source: MDPI journal article supplement (doi:10.3390/ijms22147578), 2021-07-15
Supplement: s1 [file s1]

**Supplementary Table S7.** Pearson correlation coefficients among the tested plant parameters under the control (0 mM NaCl) and salt stress (200 mM NaCl) conditions. GP, germination percentage; GE, germination energy; GI, germination index; MGT, mean germination time; GR, germination rate; SL, shoot length; RL, root length; TDW, total dry weight.

|         | Trait | GP       | GE       | GI       | MGT      | GR      | SL      | RL      | TDW |
|---------|-------|----------|----------|----------|----------|---------|---------|---------|-----|
| Control | GP    |          |          |          |          |         |         |         |     |
|         | GE    | .946***  |          |          |          |         |         |         |     |
|         | GI    | .624***  | .710***  |          |          |         |         |         |     |
|         | MGT   | -.294*** | -.440*** | -.926*** |          |         |         |         |     |
|         | GR    | .290***  | .432***  | .927***  | -.999*** |         |         |         |     |
|         | SL    | -.001ns  | .037ns   | .168**   | -.200*** | .202*** |         |         |     |
|         | RL    | .073ns   | .087ns   | .110ns   | -.100ns  | .100ns  | .254*** |         |     |
|         | TDW   | .305***  | .265***  | .088ns   | .025ns   | -.031ns | -.078ns | -.043ns |     |
| 200 mM  | GP    |          |          |          |          |         |         |         |     |
|         | GE    | .394***  |          |          |          |         |         |         |     |
|         | GI    | .758***  | .849***  |          |          |         |         |         |     |
|         | MGT   | -.577*** | -.854*** | -.943*** |          |         |         |         |     |
|         | GR    | .553***  | .890***  | .947***  | -.996*** |         |         |         |     |
|         | SL    | .439***  | .738***  | .725***  | -.718*** | .737*** |         |         |     |
|         | RL    | .357***  | .618***  | .594***  | -.576*** | .598*** | .712*** |         |     |
|         | TDW   | .785***  | .235***  | .586***  | -.471*** | .438*** | .327*** | .239*** |     |
