# Supplementary material for: Haplotype Analysis of BADH1 by Next-Generation Sequencing Reveals Association with Salt Tolerance in Rice during Domestication
Source: Int J Mol Sci. 2021 Jul 15;22(14):7578. doi: 10.3390/ijms22147578 (PMC8305476; doi:10.3390/ijms22147578)
Supplement: Supplementary file 1 [file ijms-22-07578-s001.zip]

Archive with 13 entries (13 files):
- Captions of Supplementary Materials Figures and Tables.pdf
- Supplementary Table S1_Passport inforamtion of 475 rice accession.xlsx
- Supplementary Table S2. A total number of genetic variations of BADH1 in 475 rice accessions.xlsx
- Supplementary Table S3A and B. Nucleotide divesity and Tajima's D values of 421 rice accessions.xlsx
- Supplementary Table S4. Haplotype list for cultivated rice_v2.xlsx
- Supplementary Table S5A and B. Haplotypes list for 5 cultivated rice and wild rice.xlsx
- Supplementary Table S6. The rice accessions with their mean values for 8 phenotypees.xlsx
- Supplementary Table S7_Pearson correlation coefficients among the tested plant parameters.pdf
- Supplementary Table S8A and B. The association results of salt traits.xlsx
- Supplementary Table S9A and B. The one-way ANOVA table for eight tested plant parameters based on the classified ecotypes and haplotypes.xlsx
- Supplementary_Figure_S1.TIF
- Supplementary_Figure_S2.TIF
- Supplementary_Figure_S3.TIF
