# Supplementary material for: Haplotype Analysis of BADH1 by Next-Generation Sequencing Reveals Association with Salt Tolerance in Rice during Domestication
Source: Int J Mol Sci. 2021 Jul 15;22(14):7578. doi: 10.3390/ijms22147578 (PMC8305476; doi:10.3390/ijms22147578)
Supplement: Supplementary file 1 [file ijms-22-07578-s001.zip › Supplementary Table S1_Passport inforamtion of 475 rice accession.xlsx]

## Sheet: Supplementary Table S1. The lis
Supplementary Table S1. Passport information for 475 rice accessions.
Entry_No	Variety Name in English	Ecotype	Origin	Variety Group	Seed Storage No.
RWG-001	Namseon 52	Temperate japonica	KOR	Bred	IT 005288
RWG-002	Suweon 159	Temperate japonica	KOR	Bred	IT 007099
RWG-003	Suweon 255	Indica	KOR	Bred	IT 007226
RWG-004	Suwon 301	Temperate japonica	KOR	Bred	IT 123124
RWG-005	Suweon 347	Indica	KOR	Bred	IT 192004
RWG-006	CT9993-5-10-1-M	Indica	COL	Bred	K046490
RWG-007	Rathal	Admixture	LKA	Bred	IT 248043
RWG-008	Tchampa	Aus	IRN	Bred	K046514
RWG-009	Jejubukjeju-2002-99	Temperate japonica	KOR	Weedy	IT 220821
RWG-010	Jejubukjeju-2002-171	Indica	KOR	Weedy	IT 220865
RWG-011	Jejubukjeju-2002-340	Temperate japonica	KOR	Weedy	IT 220982
RWG-012	Jejunamjeju-2002-420	Temperate japonica	KOR	Weedy	IT 221031
RWG-013	Jejubukjeju-2002-521	Indica	KOR	Weedy	IT 221094
RWG-014	Incheonkanghwasujip-16	Temperate japonica	KOR	Weedy	K019957
RWG-015	Muando	Temperate japonica	KOR	Landrace	IT 006116
RWG-016	Dadajo	Temperate japonica	KOR	Landrace	IT 005679
RWG-017	Okcheong	Temperate japonica	KOR	Landrace	IT 227933
RWG-018	Sando	Tropical japonica	KOR	Landrace	IT 006556
RWG-019	Batnarak	Tropical japonica	KOR	Landrace	IT 010340
RWG-020	Orido	Temperate japonica	KOR	Landrace	IT 007630
RWG-021	Saducho	Indica	KOR	Landrace	IT 006538
RWG-022	Seon	Indica	KOR	Landrace	IT 226487
RWG-023	Hanyangjo	Aus	KOR	Landrace	IT 009060
RWG-024	Inbujido	Temperate japonica	KOR	Landrace	IT 008196
RWG-025	Beobpanhwa	Temperate japonica	KOR	Landrace	IT 006410
RWG-026	Janmochal	Temperate japonica	KOR	Landrace	IT 227934
RWG-027	Pyodo	Temperate japonica	KOR	Landrace	IT 008999
RWG-028	Yuljojo	Temperate japonica	KOR	Landrace	K026177
RWG-029	Samgyeongjo	Temperate japonica	KOR	Landrace	IT 006596
RWG-030	Baekgokna	Indica	KOR	Landrace	IT 006303
RWG-031	Mongdonjaerae	Admixture	KOR	Landrace	IT 227937
RWG-032	Agbede	Tropical japonica	NGA	Bred	IT 000041
RWG-033	Anbaw C7	Temperate japonica	MMR	Bred	IT 000114
RWG-034	Bala	Indica	IND	Bred	K046522
RWG-035	Bellardone	Temperate japonica	FRA	Bred	IT 000314
RWG-036	Chiem Chanh	Indica	VNM	Landrace	IT 000694
RWG-037	Dharial	Aus	NPL	Bred	IT 001083
RWG-038	Dular	Aus	IND	Bred	K046515
RWG-039	IR38	Indica	PHL	Bred	IT 001907
RWG-040	Magnolia	Tropical japonica	USA	Landrace	IT 002920
RWG-041	Mala	Indica	BGD	Bred	IT 002938
RWG-042	Mushkan	Aromatic	PAK	Bred	IT 003068
RWG-043	Pukhi	Aus	PAK	Bred	IT 003482
RWG-044	Red Rice	Indica	IRN	Landrace	IT 003553
RWG-045	Tun Sart	Tropical japonica	VNM	Bred	IT 004483
RWG-046	Victoria F.A	Temperate japonica	ARG	Bred	IT 004529
RWG-047	Bai Cyue Hwa Lue	Indica	TWN	Landrace	IT 006305
RWG-048	Yangmyeon	Indica	TWN	Landrace	IT 007573
RWG-049	Belle Patna	Indica	USA	Bred	IT 009836
RWG-050	Pyeongbuk 3	Temperate japonica	PRK	Bred	IT 113470
RWG-051	Yupul	Tropical japonica	LBR	Bred	IT 152647
RWG-052	Liman Belozernij	Temperate japonica	RUS		IT 195079
RWG-053	Kagi	Aus	IND		IT 211179
RWG-054	Hatadani	Indica	LKA		IT 211182
RWG-055	Tai Mochito	Tropical japonica	THA		IT 211283
RWG-056	Waikyakushi	Indica	TWN		IT 211285
RWG-057	Upland	Tropical japonica	NGA	Bred	IT 212310
RWG-058	Newrex	Tropical japonica	USA	Bred	IT 212313
RWG-059	Doan Guang Hwa Lue	Temperate japonica	TWN	Landrace	901177
RWG-060	Wu Cyue	Indica	TWN	Landrace	901180
RWG-061	Binato	Indica	PHL	Landrace	901500
RWG-062	Avangard	Temperate japonica	UZB		IT 216884
RWG-063	Debzera	Temperate japonica	UZB		IT 217508
RWG-064	Hawm Supan	Indica	THA		K019941
RWG-065	Ssalbyeo 22	Temperate japonica	KOR	Landrace	IT 217448
RWG-066	Urasan	Tropical japonica	JPN	Landrace	901640
RWG-067	Xi Gua Bai	Indica	CHN		IT 110057
RWG-068	Yung Yuen Chuen Zim	Indica	CHN	Bred	IT 113788
RWG-069	Keng Chi Ju	Temperate japonica	CHN	Landrace	IT 114292
RWG-070	Qua 77 Wuan-Dau	Indica	CHN		IT 114588
RWG-071	Chih-Tsao-He	Indica	CHN		IT 117610
RWG-072	Hsiang-Ha-Tsan	Indica	CHN		IT 117643
RWG-073	Cheongdo-Donggok-4	Indica	KOR	Weedy	IT 168380
RWG-074	Golyeong-2	Temperate japonica	KOR	Weedy	IT 168699
RWG-075	Golyeong-6	Temperate japonica	KOR	Weedy	IT 168703
RWG-076	Danyang-7	Temperate japonica	KOR	Weedy	IT 169001
RWG-077	Danyang-38	Temperate japonica	KOR	Weedy	IT 169032
RWG-078	Hwaseong-5	Temperate japonica	KOR	Weedy	IT 169092
RWG-079	Gou 405	Temperate japonica	JPN	Bred	IT 202142
RWG-080	Baeksami	Temperate japonica	CHN	Landrace	IT 204549
RWG-081	Akaine	Tropical japonica	JPN	Landrace	IT 211334
RWG-082	Syare-61-1-B	Temperate japonica	KOR	Weedy	IT 213594
RWG-083	Syale-94-1-B	Temperate japonica	KOR	Weedy	IT 213675
RWG-084	Syale-163-1-B	Temperate japonica	KOR	Weedy	IT 213678
RWG-085	Milyang 50	Indica	KOR	Bred	IT 006235
RWG-086	Yeongpung	Indica	KOR	Bred	IT 101984
RWG-087	Iri 336	Temperate japonica	KOR	Bred	IT 151559
RWG-088	Mihyang	Temperate japonica	KOR	Bred	IT 196276
RWG-089	Moroberekan	Tropical japonica	GIN	Bred	K046503
RWG-090	Jejubukjeju-2002-115	Tropical japonica	KOR	Weedy	IT 220830
RWG-091	Jejubukjeju-2002-550	Temperate japonica	KOR	Weedy	IT 221116
RWG-092	Jejubukjeju-2002-561	Temperate japonica	KOR	Weedy	K020571
RWG-093	Huindadak	Temperate japonica	KOR	Landrace	IT 009264
RWG-094	Jotajo	Temperate japonica	KOR	Landrace	IT 008580
RWG-095	Pocheon Jangmang Me	Temperate japonica	KOR	Landrace	IT 008996
RWG-096	Dongo	Temperate japonica	KOR	Landrace	IT 005970
RWG-097	Seorianjeunbaengi	Temperate japonica	KOR	Landrace	IT 006663
RWG-098	Neul	Tropical japonica	KOR	Landrace	IT 010275
RWG-099	Jwiippari	Temperate japonica	KOR	Landrace	IT 008700
RWG-100	Jeongjonghwa	Temperate japonica	KOR	Landrace	IT 008408
RWG-101	Sodujo	Tropical japonica	KOR	Landrace	IT 010417
RWG-102	Sando	Tropical japonica	KOR	Landrace	IT 010375
RWG-103	Bori	Temperate japonica	KOR	Landrace	IT 006424
RWG-104	Naengjo	Temperate japonica	KOR	Landrace	K026193
RWG-105	Bikom	Admixture	NGA	Bred	IT 000343
RWG-106	British Honduras Creole	Tropical japonica	HND	Bred	IT 000461
RWG-107	Cartuna	Tropical japonica	IND	Bred	IT 000560
RWG-108	Sahak	Aus	PRI	Bred	IT 003703
RWG-109	Taichung-Woo-Tsan	Indica	TWN	Bred	IT 004246
RWG-110	Zilanica	Aromatic	RUS	Bred	IT 004683
RWG-111	Xao Bai Mang Sue Dao	Temperate japonica	TWN	Landrace	IT 006737
RWG-112	Di Jiao Wu Jian	Indica	TWN	Landrace	IT 008302
RWG-113	Spin Mere	Aus	AFG		IT 152642
RWG-114	Norin 22	Temperate japonica	JPN	Bred	IT 005585
RWG-115	Ssalbyeo 16	Temperate japonica	KOR	Landrace	IT 006587
RWG-116	Nian Chi Shi	Indica	CHN		IT 109904
RWG-117	Sung Pan Tao	Temperate japonica	CHN	Landrace	IT 114332
RWG-118	Tsong-Gan-Shun	Indica	CHN		IT 114620
RWG-119	San-Li-Shun	Indica	CHN	Bred	IT 114771
RWG-120	Yang-Sha-Tsan	Indica	CHN		IT 117766
RWG-121	Chungdo 23	Indica	KOR	Weedy	IT 168296
RWG-122	Chungdo Hwayang 12	Indica	KOR	Weedy	IT 168374
RWG-123	Chungdo Hwayang 14	Indica	KOR	Weedy	IT 168376
RWG-124	Sungju 3	Indica	KOR	Weedy	IT 168409
RWG-125	Jangsung 1	Indica	KOR	Weedy	IT 168469
RWG-126	Soonchun 5	Indica	KOR	Weedy	IT 168483
RWG-127	Daegu Damti 6-2	Temperate japonica	KOR	Weedy	IT 168551
RWG-128	Guechang 15	Temperate japonica	KOR	Weedy	IT 168592
RWG-129	Danyang 9	Temperate japonica	KOR	Weedy	IT 169003
RWG-130	Chungsongaengmi 4	Temperate japonica	KOR	Weedy	IT 175218
RWG-131	Suhyeonghando	Indica	CHN		IT 204592
RWG-132	Xiao zao huang	Tropical japonica	CHN		IT 211220
RWG-133	Namseon 34	Temperate japonica	KOR	Bred	IT 005275
RWG-134	Namseon 126	Temperate japonica	KOR	Bred	IT 005362
RWG-135	Milyang 88	Temperate japonica	KOR	Bred	IT 203682
RWG-136	Dudo	Temperate japonica	KOR	Landrace	IT 005980
RWG-137	IR40	Indica	PHL	Bred	IT 001908
RWG-138	Jinbu	Temperate japonica	KOR	Bred	IT 212549
RWG-139	Palgong	Temperate japonica	KOR	Bred	IT 191754
RWG-140	Hopyung	Temperate japonica	KOR	Bred	IT 191914
RWG-141	Dongjinchal	Temperate japonica	KOR	Bred	IT 196275
RWG-142	Gopum	Temperate japonica	KOR	Bred	IT 214884
RWG-143	Unkwang	Temperate japonica	KOR	Bred	IT 217814
RWG-144	Haiami	Temperate japonica	KOR	Bred	IT 235304
RWG-145	Samkwang	Temperate japonica	KOR	Bred	IT 214880
RWG-146	Hopum	Temperate japonica	KOR	Bred	IT 217826
RWG-147	Chilbo	Temperate japonica	KOR	Bred	IT 284608
RWG-148	Ilpum	Temperate japonica	KOR	Bred	IT 191781
RWG-149	Chucheong	Temperate japonica	JPN	Bred	IT 000070
RWG-150	Junam	Temperate japonica	KOR	Bred	IT 210050
RWG-151	Sindongjin	Temperate japonica	KOR	Bred	IT 212522
RWG-152	Odae	Temperate japonica	KOR	Bred	IT 154882
RWG-153	Namil	Temperate japonica	KOR	Bred	IT 251693
RWG-154	Hwaseong	Temperate japonica	KOR	Bred	IT 143771
RWG-155	Boramchan	Temperate japonica	KOR	Bred	IT 262212
RWG-156	Hwayeong	Temperate japonica	KOR	Bred	IT 191811
RWG-157	Dongjin	Temperate japonica	KOR	Bred	IT 163355
RWG-158	Nagdong	Temperate japonica	KOR	Bred	IT 006182
RWG-159	Giho	Temperate japonica	KOR	Bred	IT 009860
RWG-160	Hwacheong	Temperate japonica	KOR	Bred	IT 112423
RWG-161	Jopyeong	Temperate japonica	KOR	Bred	-
RWG-162	Chinnong	Temperate japonica	KOR	Bred	-
RWG-163	Hanareum	Indica	KOR	Bred	IT 214856
RWG-164	Dasan	Indica	KOR	Bred	IT 192044
RWG-165	Milyang 23	Indica	KOR	Bred	IT 006202
RWG-166	Samgang	Indica	KOR	Bred	IT 163351
RWG-167	Nokyang	Tropical japonica	KOR	Bred	IT 235303
RWG-168	Tongil	Indica	KOR	Bred	IT 008927
RWG-169	Unbong	Temperate japonica	KOR	Bred	IT 195097
RWG-170	Sinunbong	Temperate japonica	KOR	Bred	-
RWG-171	Sambaek	Temperate japonica	KOR	Bred	IT 191869
RWG-172	Junghwa	Temperate japonica	KOR	Bred	IT 260473
RWG-173	Geuru	Temperate japonica	KOR	Bred	IT 213063
RWG-174	Inwol	Temperate japonica	KOR	Bred	IT 196288
RWG-175	Sangmi	Temperate japonica	KOR	Bred	IT 223954
RWG-176	Geumo	Temperate japonica	KOR	Bred	-
RWG-177	Jinbuol	Temperate japonica	KOR	Bred	IT 235774
RWG-178	Jinmi	Temperate japonica	KOR	Bred	IT 160433
RWG-179	Heugjinju	Temperate japonica	KOR	Bred	IT 191964
RWG-180	Jeogjinju	Temperate japonica	KOR	Bred	IT 333049
RWG-181	Naepung	Temperate japonica	KOR	Bred	IT 191954
RWG-182	Donghae	Temperate japonica	KOR	Bred	IT 191993
RWG-183	Seoan	Temperate japonica	KOR	Bred	IT 191784
RWG-184	Gancheok	Temperate japonica	KOR	Bred	IT 251377
RWG-185	Juan	Temperate japonica	KOR	Bred	IT 191828
RWG-186	Yeonghae	Temperate japonica	KOR	Bred	IT 214400
RWG-187	Sobi	Temperate japonica	KOR	Bred	IT 212519
RWG-188	Haepyeong	Temperate japonica	KOR	Bred	IT 212540
RWG-189	Sinseonchal	Temperate japonica	KOR	Bred	IT 145265
RWG-190	Daelip 1	Temperate japonica	KOR	Bred	IT 191790
RWG-191	Seolhyangchal	Temperate japonica	KOR	Bred	K014302
RWG-192	Ilmi	Temperate japonica	KOR	Bred	IT 221719
RWG-193	Nampyeong	Temperate japonica	KOR	Bred	IT 196266
RWG-194	Gyehwa	Temperate japonica	KOR	Bred	IT 151521
RWG-195	Yeongnam	Temperate japonica	KOR	Bred	IT 203688
RWG-196	Yangjo	Temperate japonica	KOR	Bred	IT 212497
RWG-197	Aranghangchal	Temperate japonica	KOR	Bred	K007176
RWG-198	Heugnam	Temperate japonica	KOR	Bred	IT 212512
RWG-199	Goami	Temperate japonica	KOR	Bred	IT 213236
RWG-200	Manmi	Temperate japonica	KOR	Bred	IT 203721
RWG-201	Heugkwang	Temperate japonica	KOR	Bred	IT 214882
RWG-202	Norinmochi 1	Tropical japonica	JPN	Bred	IT 010258
RWG-203	Sangnambat	Tropical japonica	KOR	Bred	IT 203686
RWG-204	Anda	Indica	KOR	Bred	IT 259341
RWG-205	Taebaeg	Indica	KOR	Bred	IT 102311
RWG-206	Gaya	Indica	KOR	Bred	IT 192017
RWG-207	Baegyang	Indica	KOR	Bred	IT 212486
RWG-208	Cheongcheong	Indica	KOR	Bred	IT 101779
RWG-209	Jungwon	Indica	KOR	Bred	IT 010032
RWG-210	Nampung	Indica	KOR	Bred	IT 101994
RWG-211	Hangangchal	Indica	KOR	Bred	IT 009844
RWG-212	Goun	Temperate japonica	KOR	Bred	IT 218241
RWG-213	Pungmi	Temperate japonica	KOR	Bred	IT 217983
RWG-214	Boseogchal	Temperate japonica	KOR	Bred	IT 217816
RWG-215	Hanmaeum	Temperate japonica	KOR	Bred	IT 217817
RWG-216	Hwasin 1	Temperate japonica	KOR	Bred	IT 235272
RWG-217	Onnuri	Temperate japonica	KOR	Bred	IT 217819
RWG-218	Gangbaek	Temperate japonica	KOR	Bred	IT 217824
RWG-219	Hwangkeumnuri	Temperate japonica	KOR	Bred	IT 235277
RWG-220	Dami	Temperate japonica	KOR	Bred	IT 235278
RWG-221	Hongjinju	Temperate japonica	KOR	Bred	IT 217316
RWG-222	Sinmyungheugchal	Temperate japonica	KOR	Bred	IT 284609
RWG-223	Hoban	Temperate japonica	KOR	Bred	IT 229366
RWG-224	Heugseol	Temperate japonica	KOR	Bred	IT 218587
RWG-225	Danmi	Temperate japonica	KOR	Bred	IT 227136
RWG-226	Nogwonchal	Temperate japonica	KOR	Bred	IT 223077
RWG-227	Younghojinmi	Temperate japonica	KOR	Bred	IT 247766
RWG-228	Honong	Temperate japonica	KOR	Bred	IT 262210
RWG-229	Joun	Temperate japonica	KOR	Bred	IT 223100
RWG-230	Wolbaek	Temperate japonica	KOR	Bred	IT 227059
RWG-231	Gangchan	Temperate japonica	KOR	Bred	IT 227052
RWG-232	Shinbaeg	Temperate japonica	KOR	Bred	IT 322324
RWG-233	Geongganghongmi	Temperate japonica	KOR	Bred	IT 247765
RWG-234	Sodami	Temperate japonica	KOR	Bred	-
RWG-235	Sukwang	Temperate japonica	KOR	Bred	-
RWG-236	Seonhyangheukmi	Temperate japonica	KOR	Bred	-
RWG-237	Pungok	Temperate japonica	KOR	Bred	IT 009015
RWG-238	Wase Gingbouzu	Indica	JPN	Landrace	IT 216766
RWG-239	Palgoeng	Temperate japonica	KOR	Bred	IT 008946
RWG-240	Jinheung	Temperate japonica	KOR	Bred	IT 008727
RWG-241	Milseong	Temperate japonica	KOR	Bred	IT 006165
RWG-242	Yusin	Indica	KOR	Bred	IT 007821
RWG-243	Satbyeol	Indica	KOR	Bred	IT 008136
RWG-244	Milyang 42	Indica	KOR	Bred	IT 006227
RWG-245	Dobong	Temperate japonica	KOR	Bred	IT 009930
RWG-246	Seolag	Temperate japonica	KOR	Bred	IT 195095
RWG-247	Samnam	Temperate japonica	KOR	Bred	IT 195090
RWG-248	Seomjin	Temperate japonica	KOR	Bred	IT 145264
RWG-249	Youngdeok	Temperate japonica	KOR	Bred	IT 219210
RWG-250	Seohae	Temperate japonica	KOR	Bred	IT 112605
RWG-251	Mimyeon	Indica	KOR	Bred	IT 328754
RWG-252	MS11	Temperate japonica	KOR	Bred	IT 275684
RWG-253	Koshihikari	Temperate japonica	JPN	Bred	IT 002752
RWG-254	Sobaeg	Temperate japonica	KOR	Bred	IT 154881
RWG-255	Sangju	Temperate japonica	KOR	Bred	IT 219211
RWG-256	Samcheon	Temperate japonica	KOR	Bred	IT 196282
RWG-257	Munjang	Temperate japonica	KOR	Bred	IT 223955
RWG-258	Taebong	Temperate japonica	KOR	Bred	IT 266611
RWG-259	Dunnae	Temperate japonica	KOR	Bred	IT 191726
RWG-260	Saesangju	Temperate japonica	KOR	Bred	IT 212475
RWG-261	Manchu	Temperate japonica	KOR	Bred	IT 212534
RWG-262	Nongan	Temperate japonica	KOR	Bred	IT 191747
RWG-263	Sura	Temperate japonica	KOR	Bred	IT 217574
RWG-264	Bonggwang	Temperate japonica	JPN	Bred	IT 104600
RWG-265	Hwaseonchal	Temperate japonica	KOR	Bred	IT 191829
RWG-266	Dongan	Temperate japonica	KOR	Bred	IT 212509
RWG-267	Daesan	Temperate japonica	KOR	Bred	IT 210027
RWG-268	Nongho	Temperate japonica	KOR	Bred	IT 210034
RWG-269	Manguem	Temperate japonica	KOR	Bred	IT 174737
RWG-270	Saegyehwa	Temperate japonica	KOR	Bred	IT 212536
RWG-271	Manweol	Temperate japonica	KOR	Bred	IT 213742
RWG-272	Hyangmi 1	Indica	KOR	Bred	IT 192023
RWG-273	Hwangkeumbora	Temperate japonica	KOR	Bred	IT 235275
RWG-274	Cheonga	Temperate japonica	KOR	Bred	IT 217312
RWG-275	Cheongdam	Temperate japonica	KOR	Bred	IT 217314
RWG-276	Keunseom	Indica	KOR	Bred	IT 223977
RWG-277	Saenuri	Temperate japonica	KOR	Bred	IT 235281
RWG-278	Hwanggeumnodeul	Temperate japonica	KOR	Bred	IT 217834
RWG-279	Cheongan	Temperate japonica	KOR	Bred	IT 218585
RWG-280	Deuraechan	Temperate japonica	KOR	Bred	IT 291479
RWG-281	Jinbaek	Temperate japonica	KOR	Bred	IT 235286
RWG-282	Cheongnam	Temperate japonica	KOR	Bred	-
RWG-283	Suan	Temperate japonica	KOR	Bred	IT 242637
RWG-284	Dongbo	Temperate japonica	KOR	Bred	IT 247759
RWG-285	Seolemi	Temperate japonica	KOR	Bred	-
RWG-286	Jungsaenggold	Temperate japonica	KOR	Bred	IT 328761
RWG-287	Saeilmi	Temperate japonica	KOR	Bred	IT 318798
RWG-288	Seokwang	Temperate japonica	KOR	Bred	IT 005281
RWG-289	Saenara	Temperate japonica	KOR	Bred	IT 005469
RWG-290	Paldal	Temperate japonica	KOR	Bred	IT 008952
RWG-291	Nongbaeg	Temperate japonica	KOR	Bred	IT 005668
RWG-292	Chupung	Indica	KOR	Bred	IT 009842
RWG-293	Kwanak	Temperate japonica	KOR	Bred	IT 007187
RWG-294	Seonam	Temperate japonica	KOR	Bred	IT 195093
RWG-295	Tal	Aus	TWN	Landrace	IT 246657
RWG-296	Daw Dam	Tropical japonica	NPL		IT 113523
RWG-297	Singwang	Indica	KOR	Bred	IT 212481
RWG-298	En-shi dai Minoru	Temperate japonica	JPN		IT 291894
RWG-299	IR72	Indica	PHL	Bred	IT 207586
RWG-316	Daebo	Temperate japonica	KOR	Bred	IT 275524
RWG-317	Mipum	Temperate japonica	KOR	Bred	IT 242635
RWG-318	Jinsumi	Temperate japonica	KOR	Bred	IT 227134
RWG-319	Hyeonpum	Temperate japonica	KOR	Bred	-
RWG-320	Geonyang2ho	Temperate japonica	KOR	Bred	-
RWG-321	Geonyangmi	Temperate japonica	KOR	Bred	-
RWG-322	Geumyoung	Temperate japonica	KOR	Bred	IT 331753
RWG-323	Nunbora	Temperate japonica	KOR	Bred	IT 217828
RWG-324	Nunkeunheugchal1ho	Temperate japonica	KOR	Bred	IT 301313
RWG-325	Dabo	Temperate japonica	KOR	Bred	-
RWG-326	Dacheong	Temperate japonica	KOR	Bred	IT 235287
RWG-327	Daechan	Temperate japonica	KOR	Bred	-
RWG-328	Donghaejinmi	Temperate japonica	KOR	Bred	IT 235836
RWG-329	Manjong	Temperate japonica	KOR	Bred	IT 248699
RWG-330	Malgeumi	Temperate japonica	KOR	Bred	IT 223976
RWG-331	Matdream	Temperate japonica	KOR	Bred	IT 301300
RWG-332	Mogyang	Indica	KOR	Bred	IT 227055
RWG-333	Mogwoo	Indica	KOR	Bred	IT 274639
RWG-334	Migwang	Temperate japonica	KOR	Bred	IT 223094
RWG-335	Misomi	Temperate japonica	KOR	Bred	-
RWG-336	Milky queen	Temperate japonica	JPN	Bred	IT 212447
RWG-337	Baegseolchal	Temperate japonica	KOR	Bred	IT 235283
RWG-338	Baekogchal	Temperate japonica	KOR	Bred	IT 227135
RWG-339	Baegilmi	Temperate japonica	KOR	Bred	IT 301305
RWG-340	Bodrami	Temperate japonica	KOR	Bred	-
RWG-341	Boseogheugchal	Temperate japonica	KOR	Bred	IT 235306
RWG-342	Sandeuljinmi	Temperate japonica	KOR	Bred	IT 227131
RWG-343	Sanhomi	Temperate japonica	KOR	Bred	-
RWG-344	Sangjuchal	Temperate japonica	KOR	Bred	IT 223953
RWG-345	Saegoami	Temperate japonica	KOR	Bred	IT 275317
RWG-346	Saeodae	Temperate japonica	KOR	Bred	-
RWG-347	Saengdongchal	Temperate japonica	KOR	Bred	IT 237091
RWG-348	Seolbaek	Temperate japonica	KOR	Bred	IT 227060
RWG-349	Songjeon 3	Temperate japonica			-
RWG-350	Suryeojinmi	Temperate japonica	KOR	Bred	IT 227051
RWG-351	Subo	Temperate japonica	KOR	Bred	-
RWG-352	Sinnongheugchal	Temperate japonica	KOR	Bred	IT 284610
RWG-353	Sinbo	Temperate japonica	KOR	Bred	-
RWG-354	Anbaek	Temperate japonica	KOR	Bred	-
RWG-355	Youngbo	Temperate japonica	KOR	Bred	-
RWG-356	Ondami	Temperate japonica	KOR	Bred	IT 331754
RWG-357	Undoo Byeo	Temperate japonica	KOR	Bred	IT 213072
RWG-358	Unmi	Temperate japonica	KOR	Bred	IT 235280
RWG-359	Jakwangchal	Temperate japonica	KOR	Bred	IT 223072
RWG-360	Jado	Temperate japonica	JPN
RWG-361	Jeogjinjuchal	Temperate japonica	KOR	Bred	IT 227054
RWG-362	Jogwang	Temperate japonica	KOR	Bred	-
RWG-363	Josaengheugchal	Temperate japonica	KOR	Bred	IT 214862
RWG-364	Joami	Temperate japonica	KOR	Bred	IT 227132
RWG-365	Joan	Temperate japonica	KOR	Bred	IT 214883
RWG-366	Junamjosaeng	Temperate japonica	KOR	Bred	IT 229369
RWG-367	Jinbo Byeo	Temperate japonica	KOR	Bred	IT 251471
RWG-368	Jinseolchal	Temperate japonica	KOR	Bred	-
RWG-369	Jinok	Temperate japonica	KOR	Bred	-
RWG-370	Cheongbaekchal	Temperate japonica	KOR	Bred	-
RWG-371	Cheong Pung Heuk Chal	Temperate japonica	KOR	Bred	IT 251365
RWG-372	Cheonghaejinmi	Temperate japonica	KOR	Bred	IT 223096
RWG-373	Chungnam 1	Temperate japonica	KOR	Bred	-
RWG-374	Chungnam 2	Temperate japonica	KOR	Bred	-
RWG-375	Chindeul	Temperate japonica	KOR	Bred	-
RWG-376	Keunnun Byeo	Temperate japonica	KOR	Bred	IT 235302
RWG-377	Pyungan Byeo	Temperate japonica	KOR	Bred	IT 213276
RWG-378	Hanseol Byeo	Temperate japonica	KOR	Bred	IT 223098
RWG-379	Haedamssal	Temperate japonica	KOR	Bred	IT 301312
RWG-380	Hyangnam Byeo	Temperate japonica	KOR	Bred	IT 191971
RWG-381	Hwawang Byeo	Temperate japonica	KOR	Bred	-
RWG-382	Hwangdo	Temperate japonica	JPN		IT 264739
RWG-383	Heugsujeong	Temperate japonica	KOR	Bred	-
RWG-384	Heughyangchal1ho	Temperate japonica	KOR	Bred	-
RWG-385	Areum Byeo	Indica	KOR	Bred	IT 203719
RWG-386	Namcheon Byeo	Indica	KOR	Bred	IT 221717
RWG-387	Chilsung Byeo	Indica	KOR	Bred	IT 010688
RWG-388	Milyang 29	Indica	KOR	Bred	IT 006209
RWG-389	Jangseong Byeo	Indica	KOR	Bred	IT 212482
RWG-390	Namyeong Byeo	Indica	KOR	Bred	IT 192002
RWG-391	Pungsan Byeo	Indica	KOR	Bred	IT 212479
RWG-392	Yongju Byeo	Indica	KOR	Bred	IT 112506
RWG-393	Dasan1	Indica	KOR	Bred	IT 217315
RWG-394	Hangangchal 1	Indica	KOR	Bred	IT 223978
RWG-395	Dasan2	Indica	KOR	Bred	IT 223097
RWG-396	Segyejinmi	Indica	KOR	Bred	IT 247767
RWG-397	Hanareum 2	Indica	KOR	Bred	IT 251225
RWG-398	Josaeng Tongil	Indica	KOR	Bred	IT 007212
RWG-399	Yeongnam Josaeng	Indica	KOR	Bred	IT 006187
RWG-400	Tongilchal	Indica	KOR	Bred	IT 007225
RWG-401	Hwanggeum Byeo	Indica	KOR	Bred	IT 007222
RWG-402	Milyang 21	Indica	KOR	Bred	IT 006197
RWG-403	Milyang 22	Indica	KOR	Bred	IT 006200
RWG-404	Honam Josaeng	Indica	KOR	Bred	IT 008129
RWG-405	Geumgang Byeo	Indica	KOR	Bred	IT 007230
RWG-406	Manseok Byeo	Indica	KOR	Bred	IT 192030
RWG-407	Milyang 30	Indica	KOR	Bred	IT 009736
RWG-408	Jinju Byeo	Temperate japonica	KOR	Bred	IT 008157
RWG-409	Chiak Byeo	Temperate japonica	KOR	Bred	IT 142796
RWG-410	Sujeong Byeo	Indica	KOR	Bred	IT 006234
RWG-411	BP603	Indica	CHN		-
RWG-412	Daohuaxiang 2	Temperate japonica	CHN	Bred	IT 292036
RWG-413	Wuxiang 99-8	Temperate japonica	CHN	Bred	K037322
RWG-414	OITA KAORI INE 2	Temperate japonica	JPN	Bred	IT 210864
RWG-415	Delmont	Tropical japonica	USA	Bred	-
RWG-416	IR841-85-1-1-2	Indica	PHL	Bred	IT 122941
RWG-417	Jasmine 85	Indica	USA	Bred	K037775
RWG-418	Zixiangnuo 861	Temperate japonica	CHN	Bred	K037323
RWG-419	A-1	Tropical japonica	BTN	Bred	IT 000001
RWG-420	Goolarath	Tropical japonica	AUS	Bred	-
RWG-421	Hwangmibyeo 2	Indica	KOR	Bred	IT 191962
RWG-422	Seonhyangheukmi	Temperate japonica	KOR	Bred	-
RWG-423	SD-11	Temperate japonica	CHN	Bred	-
RWG-424	SD-25	Temperate japonica	CHN	Bred	-
RWG-425	E2	Temperate japonica	CHN	Bred	-
RWG-426	BP066	Indica	CHN	Bred	-
RWG-427	BP444	Indica	CHN	Bred	-
RWG-428	SP-519	Temperate japonica	CHN	Bred	-
RWG-429	SP-687	Temperate japonica	CHN	Bred	-
RWG-430	SP-688	Temperate japonica	CHN	Bred	-
RWG-431	SP-698	Temperate japonica	CHN	Bred	-
RWG-432	SD-1	Temperate japonica	CHN	Bred	-
RWG-433	SD-10	Temperate japonica	CHN	Bred	-
27166		Oryza officinalis		Wild	IT 145548
27167		Oryza eichingeri		Wild	IT 145571
27169		Oryza ridleyi		Wild	IT 173430
27175		Oryza longistaminata	LKA	Wild	IT 181087
27177		Oryza nivara	NPL	Wild	IT 213462
27178		Oryza nivara	NPL	Wild	IT 235530
WS-12		Oryza australiensis		Wild	Acc. 100882
WS-17		Oryza glaberrima	LBR	Wild	TOG 6589
WS-2		Oryza malabarensis		Wild	Acc. 106423
WS-20		Oryza officinalis	BFA	Wild	TOG 7291
WS-25		Oryza rufipogon		Wild	Acc. 145535
WS-29		Oryza rufipogon	KHM	Wild	Acc. 181163
WS-4		Oryza officinalis		Wild	Acc. 105910
WS-5		Oryza glaberrima		Wild	Acc. 101399
DNA-19		Oryza barthii	GIN	Wild	PI 236393
DNA-20		Oryza alta		Wild	PI 590397
DNA-21		Oryza barthii		Wild	PI 590399
DNA-22		Oryza nivara		Wild	PI 590408
DNA-26		Oryza alta		Wild	GSOR 311686
DNA-31		Oryza alta	BRA	Wild	IRGC 100161
DNA-34		Oryza australiensis	AUS	Wild	IRGC 105278
DNA-35		Oryza brachyantha	SLE	Wild	IRGC 101233
DNA-36		Oryza brachyantha	SLE	Wild	IRGC 101234
DNA-38		Oryza eichingeri	UGA	Wild	IRGC 101426
DNA-39		Oryza eichingeri	UGA	Wild	IRGC 105161
DNA-40		Oryza glumaepatula	BRA	Wild	IRGC 100970
DNA-41		Oryza glumaepatula	BRA	Wild	IRGC 88800
DNA-42		Oryza glumaepatula	BRA	Wild	IRGC 105668
DNA-43		Oryza grandiglumis	BRA	Wild	IRGC 106241
DNA-44		Oryza grandiglumis	BRA	Wild	IRGC 105155
DNA-45		Oryza grandiglumis	BRA	Wild	IRGC 105156
DNA-46		Oryza latifolia	IDN	Wild	IRGC 105111
DNA-47		Oryza latifolia		Wild	IRGC 101394
DNA-48		Oryza latifolia		Wild	IRGC 80770
DNA-49		Oryza longiglumis	IDN	Wild	IRGC 105147
DNA-50		Oryza longiglumis	IDN	Wild	IRGC 105562
DNA-51		Oryza longistaminata	SLE	Wild	IRGC 101228
DNA-52		Oryza longistaminata	CMR	Wild	IRGC 92664
DNA-54		Oryza malampuzhaensis	IND	Wild	IRGC 100957
DNA-55		Oryza malampuzhaensis	IND	Wild	IRGC 105322
DNA-56		Oryza malampuzhaensis	IND	Wild	IRGC 80768
DNA-57		Oryza meridionalis	AUS	Wild	IRGC 105279
DNA-58		Oryza meridionalis	AUS	Wild	IRGC 101466
DNA-59		Oryza minuta	PHL	Wild	IRGC 93257
DNA-60		Oryza minuta	PHL	Wild	IRGC 101128
DNA-66		Oryza punctata	NGA	Wild	IRGC 105982
DNA-67		Oryza punctata		Wild	IRGC 100126
DNA-68		Oryza punctata		Wild	IRGC 101441
DNA-69		Oryza rhizomatis	LKA	Wild	IRGC 105448
DNA-70		Oryza rhizomatis	LKA	Wild	IRGC 103410
DNA-71		Oryza rhizomatis	LKA	Wild	IRGC 105660
DNA-72		Oryza rufipogon	LAO	Wild	IRGC 93249
DNA-80		Oryza glaberrima	BFA	Wild	IRGC 103469
DNA-82		Oryza barthii	TCD	Wild	IRGC 104119
DNA-A1	Tubtim chumphae	Indica	THA	Bred	KR 02605
DNA-A2	Hom mali nin surin	Indica	THA	Bred	KR 02604
DNA-A3	Khao Dawk Mali 105	Indica	THA	Bred	KR 02602
DNA-A4	Pathumthani 1	Indica	THA	Bred	KR 02603
