# Supplementary material for: Haplotype Analysis of BADH1 by Next-Generation Sequencing Reveals Association with Salt Tolerance in Rice during Domestication
Source: Int J Mol Sci. 2021 Jul 15;22(14):7578. doi: 10.3390/ijms22147578 (PMC8305476; doi:10.3390/ijms22147578)
Supplement: Supplementary file 1 [file ijms-22-07578-s001.zip › Supplementary Table S2. A total number of genetic variations of BADH1 in 475 rice accessions.xlsx]

## Sheet: Sheet1
Supplementary Table S2. A total number of genetic variations of BADH1 in 421 cultivated rice and 54 wild rice accessions. The cultivated rice was subdivided into subpopulations (ecotypes), Temperate Japonica, Tropical Japonica, Indica, Aus, Aromatic and Admixture. The number of variants were counted under each ecotype of cultivated rice but in wild rice, the number were counted under each species…
Ecotype	SNPs	Insertion	Deletion	Structure Variation	Total accession
Temperate Japonica	0	1	0	0	279
Tropical Japonica	1	1	0	0	26
Indica	23	2	1	0	102
Aus	23	2	0	0	9
Aromatic	0	1	0	0	2
Admixture	15	2	0	0	3
Oryza officinalis	71	4	4	0	3
Oryza eichingeri	64	2	3	0	3
Oryza ridleyi	70	1	0	0	1
Oryza longistaminata	75	25	17	1	3
Oryza nivara	73	2	0	0	3
Oryza barthii	69	1	2	0	3
Oryza alta	65	0	3	0	3
Oryza australiensis	73	0	2	0	2
Oryza brachyantha	54	0	0	0	2
Oryza glumaepatula	70	1	0	0	3
Oryza grandiglumis	65	1	6	0	3
Oryza latifolia	66	1	5	0	3
Oryza longiglumis	62	0	0	0	2
Oryza malampuzhaensis	66	2	7	0	3
Oryza meridionalis	76	9	5	0	2
Oryza minuta	66	2	5	1	2
Oryza punctata	67	4	7	0	3
Oryza rhizomatis	67	0	2	0	3
Oryza rufipogon	69	2	3	0	3
Oryza glaberrima	75	1	2	0	3
Oryza malabarensis	71	1	2	0	1
