# Supplementary material for: Haplotype Analysis of BADH1 by Next-Generation Sequencing Reveals Association with Salt Tolerance in Rice during Domestication
Source: Int J Mol Sci. 2021 Jul 15;22(14):7578. doi: 10.3390/ijms22147578 (PMC8305476; doi:10.3390/ijms22147578)
Supplement: Supplementary file 1 [file ijms-22-07578-s001.zip › Supplementary Table S3A and B. Nucleotide divesity and Tajima's D values of 421 rice accessions.xlsx]

## Sheet: NucleotideDiveristy_Tajima'sD
Supplementary Table S3A. Nucleotide diversity (𝝿-values) of BADH1 in 421 cultivated and 54 wild rice accessions. The diversity values were patterned in 10000 bp (10kb) sliding window size and taken out for different classified rice groups, Temperate Japonica, Tropical Japonica, Indica, Aus, Aromatic and Admixture, including the whole rice accession.								Supplementary Table S3B. Tajima's D values of BADH1 in 421 cultivated and 54 wild rice accessions. The Tajima's D values were patterned in 10000 bp (10kb) sliding window size and taken out for different classified rice groups, Temperate Japonica, Tropical Japonica, Indica, Aus, Aromatic and Admixture, including the whole rice accession.
CHROM	BIN_START	BIN_END	N_VARIANTS	PI	Variables			CHROM	BIN_START	N_SNPS	TajimaD	Variables
4	22970001	22980000	475	0.000904649	Whole			4	22970000	422	-2.51549	Whole
4	22980001	22990000	314	0.000753593	Whole			4	22980000	304	-2.34605	Whole
4	22990001	23000000	314	0.000646431	Whole			4	22990000	284	-2.47202	Whole
4	23000001	23010000	612	0.00149997	Whole			4	23000000	546	-2.31906	Whole
4	23010001	23020000	636	0.00158929	Whole			4	23010000	586	-2.26701	Whole
4	23020001	23030000	273	0.000655485	Whole			4	23020000	261	-2.3721	Whole
4	23030001	23040000	705	0.00188063	Whole			4	23030000	621	-2.35229	Whole
4	23040001	23050000	357	0.000917323	Whole			4	23040000	327	-2.37906	Whole
4	23050001	23060000	567	0.00116745	Whole			4	23050000	501	-2.47069	Whole
4	23060001	23070000	929	0.00195375	Whole			4	23060000	820	-2.49124	Whole
4	23070001	23080000	787	0.00113444	Whole			4	23070000	724	-2.58923	Whole
4	23080001	23090000	319	0.000578579	Whole			4	23080000	300	-2.48646	Whole
4	23090001	23100000	414	0.000682862	Whole			4	23090000	377	-2.53709	Whole
4	23100001	23110000	504	0.000838012	Whole			4	23100000	480	-2.52137	Whole
4	23110001	23120000	679	0.00157259	Whole			4	23110000	603	-2.427	Whole
4	23120001	23130000	469	0.000923914	Whole			4	23120000	436	-2.47158	Whole
4	23130001	23140000	489	0.00109304	Whole			4	23130000	460	-2.44422	Whole
4	23140001	23150000	426	0.00195057	Whole			4	23140000	383	-1.97575	Whole
4	23150001	23160000	512	0.00158424	Whole			4	23150000	486	-2.235	Whole
4	23160001	23170000	725	0.00328754	Whole			4	23160000	659	-1.90893	Whole
4	23170001	23180000	499	0.00304343	Whole			4	23170000	456	-1.56762	Whole
4	23180001	23190000	562	0.00254937	Whole			4	23180000	520	-1.92842	Whole
4	23190001	23200000	612	0.0031143	Whole			4	23190000	543	-1.76543	Whole
4	23200001	23210000	805	0.00359787	Whole			4	23200000	724	-1.92966	Whole
4	23210001	23220000	427	0.00242747	Whole			4	23210000	402	-1.57911	Whole
4	23220001	23230000	526	0.00222656	Whole			4	23220000	494	-2.03719	Whole
4	23230001	23240000	545	0.00286961	Whole			4	23230000	491	-1.7383	Whole
4	23240001	23250000	889	0.00474409	Whole			4	23240000	800	-1.77319	Whole
4	23250001	23260000	774	0.00343458	Whole			4	23250000	700	-1.88215	Whole
4	23260001	23270000	791	0.0041104	Whole			4	23260000	743	-1.73404	Whole
4	23270001	23280000	460	0.00268188	Whole			4	23270000	423	-1.62638	Whole
4	23280001	23290000	295	0.00108584	Whole			4	23280000	285	-1.99133	Whole
4	23290001	23300000	348	0.0020244	Whole			4	23290000	313	-1.63289	Whole
4	23300001	23310000	305	0.00125869	Whole			4	23300000	286	-2.03981	Whole
4	23310001	23320000	645	0.00242122	Whole			4	23310000	606	-2.06796	Whole
4	23320001	23330000	432	0.00155622	Whole			4	23320000	406	-2.11857	Whole
4	23330001	23340000	362	0.00171004	Whole			4	23330000	340	-1.90453	Whole
4	23340001	23350000	713	0.00123463	Whole			4	23340000	651	-2.55002	Whole
4	23350001	23360000	471	0.000891652	Whole			4	23350000	436	-2.50938	Whole
4	23360001	23370000	353	0.000653297	Whole			4	23360000	326	-2.5295	Whole
4	23370001	23380000	189	0.000351354	Whole			4	23370000	184	-2.46547	Whole
4	22970001	22980000	83	0.000563196	Indica			4	22970000	62	-1.84816	Indica
4	22980001	22990000	81	0.000326987	Indica			4	22980000	78	-2.31302	Indica
4	22990001	23000000	75	0.000466043	Indica			4	22990000	67	-1.97469	Indica
4	23000001	23010000	174	0.00144909	Indica			4	23000000	149	-1.06956	Indica
4	23010001	23020000	284	0.00225617	Indica			4	23010000	254	-1.44581	Indica
4	23020001	23030000	58	0.000291079	Indica			4	23020000	54	-2.07241	Indica
4	23030001	23040000	186	0.00147606	Indica			4	23030000	155	-1.7224	Indica
4	23040001	23050000	76	0.000367352	Indica			4	23040000	62	-2.12839	Indica
4	23050001	23060000	99	0.00063321	Indica			4	23050000	83	-1.83596	Indica
4	23060001	23070000	241	0.00159082	Indica			4	23060000	192	-1.94901	Indica
4	23070001	23080000	113	0.000425484	Indica			4	23070000	107	-2.37502	Indica
4	23080001	23090000	45	0.000263608	Indica			4	23080000	43	-1.87381	Indica
4	23090001	23100000	67	0.000271859	Indica			4	23090000	57	-2.2302	Indica
4	23100001	23110000	81	0.000313879	Indica			4	23100000	72	-2.22389	Indica
4	23110001	23120000	135	0.000600817	Indica			4	23110000	115	-2.30395	Indica
4	23120001	23130000	63	0.000397342	Indica			4	23120000	53	-1.82385	Indica
4	23130001	23140000	80	0.000615935	Indica			4	23130000	67	-1.62289	Indica
4	23140001	23150000	85	0.00295219	Indica			4	23140000	61	3.89295	Indica
4	23150001	23160000	68	0.00191963	Indica			4	23150000	61	2.3563	Indica
4	23160001	23170000	194	0.00473768	Indica			4	23160000	162	1.68484	Indica
4	23170001	23180000	130	0.00434609	Indica			4	23170000	113	3.15285	Indica
4	23180001	23190000	127	0.00292272	Indica			4	23180000	105	1.32453	Indica
4	23190001	23200000	140	0.00362155	Indica			4	23190000	121	1.72226	Indica
4	23200001	23210000	195	0.00379082	Indica			4	23200000	169	0.548895	Indica
4	23210001	23220000	117	0.002539	Indica			4	23210000	108	1.12379	Indica
4	23220001	23230000	108	0.00222423	Indica			4	23220000	91	0.612456	Indica
4	23230001	23240000	144	0.00300777	Indica			4	23230000	119	0.91573	Indica
4	23240001	23250000	280	0.0057003	Indica			4	23240000	233	0.686286	Indica
4	23250001	23260000	222	0.00379927	Indica			4	23250000	189	0.0993438	Indica
4	23260001	23270000	247	0.00452971	Indica			4	23260000	221	0.317801	Indica
4	23270001	23280000	134	0.00293169	Indica			4	23270000	115	1.01323	Indica
4	23280001	23290000	95	0.00127274	Indica			4	23280000	90	0.0802005	Indica
4	23290001	23300000	100	0.00202137	Indica			4	23290000	84	0.979242	Indica
4	23300001	23310000	68	0.00166443	Indica			4	23300000	61	1.19474	Indica
4	23310001	23320000	140	0.00407301	Indica			4	23310000	121	2.58525	Indica
4	23320001	23330000	71	0.00226321	Indica			4	23320000	62	2.91251	Indica
4	23330001	23340000	97	0.00283682	Indica			4	23330000	87	2.12602	Indica
4	23340001	23350000	138	0.000806407	Indica			4	23340000	115	-2.07255	Indica
4	23350001	23360000	101	0.000776398	Indica			4	23350000	88	-1.60753	Indica
4	23360001	23370000	54	0.000422937	Indica			4	23360000	46	-1.67518	Indica
4	23370001	23380000	21	0.000123521	Indica			4	23370000	21	-1.75484	Indica
4	22970001	22980000	32	0.000119251	Temperate_japonica			4	22970000	25	-1.87504	Temperate_japonica
4	22980001	22990000	20	0.000220803	Temperate_japonica			4	22980000	19	-0.603316	Temperate_japonica
4	22990001	23000000	11	0.000137475	Temperate_japonica			4	22990000	10	-0.429902	Temperate_japonica
4	23000001	23010000	85	0.000392681	Temperate_japonica			4	23000000	76	-1.85544	Temperate_japonica
4	23010001	23020000	161	0.000561744	Temperate_japonica			4	23010000	152	-2.01697	Temperate_japonica
4	23020001	23030000	9	0.000111062	Temperate_japonica			4	23020000	8	-0.236485	Temperate_japonica
4	23030001	23040000	74	0.000496071	Temperate_japonica			4	23030000	62	-1.58317	Temperate_japonica
4	23040001	23050000	25	0.000278742	Temperate_japonica			4	23040000	19	-0.62216	Temperate_japonica
4	23050001	23060000	25	0.000264813	Temperate_japonica			4	23050000	24	-0.664681	Temperate_japonica
4	23060001	23070000	87	0.000542314	Temperate_japonica			4	23060000	62	-1.50622	Temperate_japonica
4	23070001	23080000	14	0.000150451	Temperate_japonica			4	23070000	11	-0.275833	Temperate_japonica
4	23080001	23090000	11	8.04e-05	Temperate_japonica			4	23080000	10	-0.910695	Temperate_japonica
4	23090001	23100000	18	0.000156577	Temperate_japonica			4	23090000	15	-0.755819	Temperate_japonica
4	23100001	23110000	17	0.000136646	Temperate_japonica			4	23100000	16	-0.892846	Temperate_japonica
4	23110001	23120000	48	0.000311606	Temperate_japonica			4	23110000	34	-1.48452	Temperate_japonica
4	23120001	23130000	17	0.000276656	Temperate_japonica			4	23120000	17	0.335032	Temperate_japonica
4	23130001	23140000	19	0.000206017	Temperate_japonica			4	23130000	17	-0.696969	Temperate_japonica
4	23140001	23150000	25	0.000303405	Temperate_japonica			4	23140000	16	0.00267697	Temperate_japonica
4	23150001	23160000	23	0.000333053	Temperate_japonica			4	23150000	17	0.0518626	Temperate_japonica
4	23160001	23170000	33	0.000298828	Temperate_japonica			4	23160000	28	-0.898396	Temperate_japonica
4	23170001	23180000	12	5.15e-05	Temperate_japonica			4	23170000	11	-1.45514	Temperate_japonica
4	23180001	23190000	10	7.05e-05	Temperate_japonica			4	23180000	8	-0.8689	Temperate_japonica
4	23190001	23200000	12	3.49e-05	Temperate_japonica			4	23190000	8	-1.49346	Temperate_japonica
4	23200001	23210000	11	5.58e-05	Temperate_japonica			4	23200000	8	-1.03849	Temperate_japonica
4	23210001	23220000	12	5.85e-05	Temperate_japonica			4	23210000	11	-1.36928	Temperate_japonica
4	23220001	23230000	11	4.77e-05	Temperate_japonica			4	23220000	9	-1.30468	Temperate_japonica
4	23230001	23240000	13	1.82e-05	Temperate_japonica			4	23230000	8	-1.80653	Temperate_japonica
4	23240001	23250000	24	0.000151799	Temperate_japonica			4	23240000	17	-1.34443	Temperate_japonica
4	23250001	23260000	23	0.000165421	Temperate_japonica			4	23250000	19	-1.25567	Temperate_japonica
4	23260001	23270000	23	0.000250553	Temperate_japonica			4	23260000	19	-0.736991	Temperate_japonica
4	23270001	23280000	5	1.88e-05	Temperate_japonica			4	23270000	5	-1.25535	Temperate_japonica
4	23280001	23290000	10	4.61e-05	Temperate_japonica			4	23280000	9	-0.989377	Temperate_japonica
4	23290001	23300000	6	6.04e-05	Temperate_japonica			4	23290000	6	-0.535844	Temperate_japonica
4	23300001	23310000	4	2.14e-06	Temperate_japonica			4	23300000	4	-1.50662	Temperate_japonica
4	23310001	23320000	12	3.67e-05	Temperate_japonica			4	23310000	11	-1.57661	Temperate_japonica
4	23320001	23330000	6	8.17e-05	Temperate_japonica			4	23320000	6	-0.103014	Temperate_japonica
4	23330001	23340000	6	5.96e-05	Temperate_japonica			4	23330000	6	-0.558814	Temperate_japonica
4	23340001	23350000	16	0.000157529	Temperate_japonica			4	23340000	16	-0.541065	Temperate_japonica
4	23350001	23360000	8	4.96e-05	Temperate_japonica			4	23350000	6	-0.875862	Temperate_japonica
4	23360001	23370000	12	0.000117419	Temperate_japonica			4	23360000	11	-1.08812	Temperate_japonica
4	23370001	23380000	3	7.06e-06	Temperate_japonica			4	23370000	3	-1.17455	Temperate_japonica
4	22970001	22980000	12	9.29e-05	Tropical_japonica			4	22970000	9	-1.89608	Tropical_japonica
4	22980001	22990000	3	7.15e-05	Tropical_japonica			4	22980000	3	0.175664	Tropical_japonica
4	22990001	23000000	4	0.000118552	Tropical_japonica			4	22990000	3	0.120221	Tropical_japonica
4	23000001	23010000	57	0.000599652	Tropical_japonica			4	23000000	52	-1.20035	Tropical_japonica
4	23010001	23020000	129	0.00112447	Tropical_japonica			4	23010000	115	-1.35593	Tropical_japonica
4	23020001	23030000	5	0.000108522	Tropical_japonica			4	23020000	5	-0.0461986	Tropical_japonica
4	23030001	23040000	28	0.00101761	Tropical_japonica			4	23030000	20	2.44651	Tropical_japonica
4	23040001	23050000	7	0.000100152	Tropical_japonica			4	23040000	6	-0.700468	Tropical_japonica
4	23050001	23060000	5	7.48e-05	Tropical_japonica			4	23050000	5	-0.648764	Tropical_japonica
4	23060001	23070000	24	0.000265692	Tropical_japonica			4	23060000	18	-1.41271	Tropical_japonica
4	23070001	23080000	2	2.9e-05	Tropical_japonica			4	23070000	1	-0.876742	Tropical_japonica
4	23080001	23090000	4	0.000123983	Tropical_japonica			4	23080000	4	0.916279	Tropical_japonica
4	23090001	23100000	7	8.65e-05	Tropical_japonica			4	23090000	5	-0.732684	Tropical_japonica
4	23100001	23110000	6	0.000136967	Tropical_japonica			4	23100000	6	0.352989	Tropical_japonica
4	23110001	23120000	9	0.000155079	Tropical_japonica			4	23110000	7	-0.546868	Tropical_japonica
4	23120001	23130000	7	0.000174363	Tropical_japonica			4	23120000	7	0.360939	Tropical_japonica
4	23130001	23140000	5	0.000118477	Tropical_japonica			4	23130000	4	0.663606	Tropical_japonica
4	23140001	23150000	8	0.000195176	Tropical_japonica			4	23140000	6	0.0821333	Tropical_japonica
4	23150001	23160000	7	0.000126998	Tropical_japonica			4	23150000	5	0.1078	Tropical_japonica
4	23160001	23170000	12	0.000188922	Tropical_japonica			4	23160000	10	-0.831954	Tropical_japonica
4	23170001	23180000	7	0.000161463	Tropical_japonica			4	23170000	7	0.111105	Tropical_japonica
4	23180001	23190000	10	0.000172256	Tropical_japonica			4	23180000	8	-0.895261	Tropical_japonica
4	23190001	23200000	3	2.26e-05	Tropical_japonica			4	23190000	2	-1.16502	Tropical_japonica
4	23200001	23210000	10	0.000126173	Tropical_japonica			4	23200000	8	-0.953104	Tropical_japonica
4	23210001	23220000	6	0.000101741	Tropical_japonica			4	23210000	6	-0.447775	Tropical_japonica
4	23220001	23230000	4	9.74e-05	Tropical_japonica			4	23220000	3	-0.158928	Tropical_japonica
4	23230001	23240000	2	3.32e-05	Tropical_japonica			4	23230000	1	-0.820297	Tropical_japonica
4	23240001	23250000	27	0.000314565	Tropical_japonica			4	23240000	21	-1.78654	Tropical_japonica
4	23250001	23260000	11	0.000227076	Tropical_japonica			4	23250000	8	-0.329434	Tropical_japonica
4	23260001	23270000	17	0.000330473	Tropical_japonica			4	23260000	15	-0.119216	Tropical_japonica
4	23270001	23280000	3	4.16e-05	Tropical_japonica			4	23270000	3	-0.763752	Tropical_japonica
4	23280001	23290000	15	0.000110679	Tropical_japonica			4	23280000	15	-1.28783	Tropical_japonica
4	23290001	23300000	3	3.79e-05	Tropical_japonica			4	23290000	3	-0.877738	Tropical_japonica
4	23300001	23310000	1	1.45e-05	Tropical_japonica			4	23300000	1	-0.459764	Tropical_japonica
4	23310001	23320000	19	0.000192777	Tropical_japonica			4	23310000	17	-1.50538	Tropical_japonica
4	23320001	23330000	9	0.000248576	Tropical_japonica			4	23320000	8	1.14748	Tropical_japonica
4	23330001	23340000	2	5.37e-05	Tropical_japonica			4	23330000	2	0.376776	Tropical_japonica
4	23340001	23350000	15	0.000164044	Tropical_japonica			4	23340000	14	-1.36569	Tropical_japonica
4	23350001	23360000	7	0.00010528	Tropical_japonica			4	23350000	5	-1.14549	Tropical_japonica
4	23360001	23370000	6	0.000127681	Tropical_japonica			4	23360000	5	-0.640943	Tropical_japonica
4	23370001	23380000	2	1.51e-05	Tropical_japonica			4	23370000	2	-1.16502	Tropical_japonica
4	22970001	22980000	417	0.00268838	Wild			4	22970000	366	-0.744026	Wild
4	22980001	22990000	284	0.00183204	Wild			4	22980000	275	-0.861197	Wild
4	22990001	23000000	273	0.00181466	Wild			4	22990000	245	-1.72051	Wild
4	23000001	23010000	502	0.00257724	Wild			4	23000000	442	-1.27975	Wild
4	23010001	23020000	417	0.00165583	Wild			4	23010000	373	-1.02185	Wild
4	23020001	23030000	246	0.00176492	Wild			4	23020000	234	-1.1989	Wild
4	23030001	23040000	618	0.00343195	Wild			4	23030000	539	-0.993096	Wild
4	23040001	23050000	324	0.00239789	Wild			4	23040000	297	-1.35428	Wild
4	23050001	23060000	533	0.00288367	Wild			4	23050000	467	-1.21839	Wild
4	23060001	23070000	842	0.00378366	Wild			4	23060000	740	-1.17276	Wild
4	23070001	23080000	752	0.00343097	Wild			4	23070000	690	-1.07406	Wild
4	23080001	23090000	300	0.00158977	Wild			4	23080000	281	-1.28177	Wild
4	23090001	23100000	382	0.00218185	Wild			4	23090000	346	-1.36133	Wild
4	23100001	23110000	470	0.0025278	Wild			4	23100000	446	-1.30471	Wild
4	23110001	23120000	597	0.00343532	Wild			4	23110000	526	-0.784454	Wild
4	23120001	23130000	425	0.00258547	Wild			4	23120000	392	-1.27066	Wild
4	23130001	23140000	442	0.00283706	Wild			4	23130000	414	-1.16536	Wild
4	23140001	23150000	364	0.00253704	Wild			4	23140000	326	-1.3477	Wild
4	23150001	23160000	455	0.00271324	Wild			4	23150000	431	-1.50346	Wild
4	23160001	23170000	633	0.00286543	Wild			4	23160000	575	-1.06406	Wild
4	23170001	23180000	432	0.00268588	Wild			4	23170000	390	-0.990977	Wild
4	23180001	23190000	504	0.00275624	Wild			4	23180000	463	-1.31295	Wild
4	23190001	23200000	527	0.00284986	Wild			4	23190000	464	-1.04853	Wild
4	23200001	23210000	720	0.00368133	Wild			4	23200000	639	-0.904819	Wild
4	23210001	23220000	379	0.00237135	Wild			4	23210000	354	-0.976604	Wild
4	23220001	23230000	478	0.00256703	Wild			4	23220000	449	-1.37266	Wild
4	23230001	23240000	506	0.00305405	Wild			4	23230000	457	-1.05084	Wild
4	23240001	23250000	791	0.00338239	Wild			4	23240000	714	-1.07396	Wild
4	23250001	23260000	696	0.00242838	Wild			4	23250000	627	-0.906739	Wild
4	23260001	23270000	716	0.00289766	Wild			4	23260000	670	-1.2555	Wild
4	23270001	23280000	423	0.00226208	Wild			4	23270000	387	-1.13378	Wild
4	23280001	23290000	230	0.00125871	Wild			4	23280000	221	-1.65768	Wild
4	23290001	23300000	300	0.0022301	Wild			4	23290000	271	-1.08112	Wild
4	23300001	23310000	271	0.00198766	Wild			4	23300000	252	-1.25715	Wild
4	23310001	23320000	590	0.00312783	Wild			4	23310000	554	-1.10975	Wild
4	23320001	23330000	399	0.00257569	Wild			4	23320000	376	-1.30898	Wild
4	23330001	23340000	304	0.00229266	Wild			4	23330000	284	-1.25376	Wild
4	23340001	23350000	615	0.00293802	Wild			4	23340000	556	-1.00693	Wild
4	23350001	23360000	409	0.00263709	Wild			4	23350000	376	-0.845699	Wild
4	23360001	23370000	318	0.00219244	Wild			4	23360000	293	-1.30556	Wild
4	23370001	23380000	165	0.00167185	Wild			4	23370000	161	-1.08938	Wild
