# Supplementary material for: Haplotype Analysis of BADH1 by Next-Generation Sequencing Reveals Association with Salt Tolerance in Rice during Domestication
Source: Int J Mol Sci. 2021 Jul 15;22(14):7578. doi: 10.3390/ijms22147578 (PMC8305476; doi:10.3390/ijms22147578)
Supplement: Supplementary file 1 [file ijms-22-07578-s001.zip › Supplementary Table S4. Haplotype list for cultivated rice_v2.xlsx]

## Sheet: 421accession_haplogroup39
	Supplementary Table S4. Haplotyping revealed total number all SNPs (single nucleotide polymorphism) and InDels (insertions and deletions) detected in the gene region of BADH1 in 421 cultivated rice accessions. Based on their similar genetic variations, there were 39 haplotype groups (here we used as 'Hap', indicating their functional SNPs in both exons and introns. There were totally 224 alleles …
	Position	Cultivated Ecotype						Total Number of Rice Accession	23171520	23171522	23171527	23171537	23171566	23171569	23171587	23171600	23171601	23171611	23171633	23171638	23171735	23171760	23171764	23171776	23171863	23171901	23171943	23171954	23171971	23171972	23172025	23172031	23172150	23172169	23172221	23172233	23172245	23172255	23172258	23172293	23172317	23172349	23172351	23172365	23172368	23172379	23172380	23172391	23172399
	Chromosome 4								T	G	T	G	C	G	G	A	G	G	C	A	G	C	C	T	C	A	T	T	G	C	T	A	G	T	T	A	A	C	G	C	A	A	G	A	C	T	T	T	T
	Reference	Admixture	Aromatic	Aus	Indica	Temperate japonica	Tropical japonica		T	G	TTGCATTC	G	C	G	G	A	GCA	G	CATATACTGTAATTCATAAGTTGCTATTGCCATGCAAGGCTTATTGTAAGACCGTAAGAGCAACTGTAA	A	GGTTGA	CGT	CT	T	C	A	T	TTG	G	C	T	A	G	T	T	A	A	C	G	C	A	A	G	A	CA	TTAA	TAA	T	T
	OS04G0464200								<	<	<	<	<	<	<	<	<	<	<	<	<	<	<	<	<	<	<	<	<	<	<	<	<	<	<	<	<	<	<	<	<	<	<	<	<	<	<	<	<
	Exon								15	15	15	15	15	15	15	15	15	15	15	15	15	15	15	15	15															13	13
	Amino Acids																								S -> I															E -> E	I -> I
	Codon																								AGC -> ATC															GAG -> GAA	ATT -> ATC
	Hap_1				1			1	T	T	0	G	C	0	0	A	0	G	0	A	0	0	0	T	C	A	T	0	G	C	0	A	G	T	T	A	A	C	G	C	A	0	0	A	0	0	-1	0	T
	Hap_2				14		6	20	T	G	0	G	C	0	0	A	0	G	0	A	0	0	0	T	C	A	T	0	G	C	0	A	G	T	T	A	A	C	G	C	A	0	0	A	0	0	0	0	T
	Hap_3				5	244	15	264	T	G	0	G	C	0	0	A	0	G	0	A	0	0	0	T	C	A	T	0	G	C	0	A	G	T	T	A	A	C	G	C	A	0	0	A	0	0	0	0	T
	Hap_4					13	3	16	T	G	0	G	C	0	0	A	0	G	0	A	0	0	0	T	C	A	T	0	G	C	0	A	G	T	T	A	A	C	G	C	A	0	0	A	0	0	0	0	T
	Hap_5				1	10	1	12	T	G	0	G	C	0	0	A	0	G	0	A	0	0	0	T	C	A	T	0	G	C	0	A	G	T	T	A	A	C	G	C	A	0	0	A	0	0	0	0	T
	Hap_6				4			4	T	T	0	G	C	0	0	A	0	G	0	A	0	0	0	T	C	A	T	0	G	C	0	A	G	T	T	A	A	C	G	C	A	0	0	A	0	0	-1	0	T
	Hap_7				1	4		5	T	G	0	G	C	0	0	A	0	G	0	A	0	0	0	T	C	A	T	0	G	C	0	A	G	T	T	A	A	C	G	C	A	0	0	A	0	0	0	0	T
	Hap_8				3			3	T	T	0	G	C	0	0	A	0	G	0	A	0	0	0	T	C	A	T	0	G	C	0	A	G	T	T	A	A	C	G	C	A	0	0	A	0	0	-1	0	T
	Hap_9	1			1			2	T	T	0	G	C	0	0	A	0	G	0	A	0	0	0	T	C	A	T	0	G	C	0	A	G	T	T	A	A	C	G	C	A	0	0	A	0	0	0	0	T
	Hap_10	1		2				3	T	G	0	G	C	0	0	A	0	G	0	A	0	0	0	T	C	A	T	0	G	C	0	A	G	T	T	A	A	C	G	C	A	0	0	A	0	0	0	0	T
	Hap_11				1		1	2	T	G	0	G	C	0	0	A	0	G	0	A	0	0	0	T	C	A	T	0	G	C	0	A	G	T	T	A	A	C	G	C	A	0	0	A	0	0	0	0	T
	Hap_12				1			1	T	T	0	G	C	0	0	A	0	G	0	A	0	0	0	T	C	A	T	0	G	C	0	A	G	T	T	A	A	C	G	C	A	0	0	A	0	0	0	0	T
	Hap_13				1			1	T	G	0	G	C	0	0	A	0	G	0	A	0	0	0	T	C	A	T	0	G	C	0	A	G	T	T	A	A	C	G	C	A	0	0	A	0	0	0	0	T
	Hap_14			1	0			1	T	G	0	G	C	0	0	A	0	G	0	A	0	0	0	T	C	A	T	0	G	C	0	A	G	T	T	A	A	C	G	C	A	0	0	A	0	0	0	0	T
	Hap_15				1			1	T	T	0	G	C	0	0	A	0	G	0	A	0	0	0	T	C	A	T	0	G	C	0	A	G	T	T	A	A	C	G	C	A	0	0	A	0	0	0	0	T
	Hap_16				1			1	T	T	0	G	C	0	0	A	0	G	0	A	0	0	0	T	C	A	T	0	G	C	0	A	G	T	T	A	A	C	G	C	A	0	0	A	0	0	0	0	T
	Hap_17		1	3	1			5	T	G	0	G	C	0	0	A	0	G	0	A	0	0	0	T	C	A	T	0	G	C	0	A	G	T	T	A	A	C	G	C	A	0	0	A	0	0	0	0	T
	Hap_18				40			40	T	T	0	G	C	0	0	A	0	G	0	A	0	0	0	T	C	A	T	0	G	C	0	A	G	T	T	A	A	C	G	C	A	0	0	A	0	0	-2	0	T
	Hap_19			1				1	T	T	0	G	C	0	0	A	0	G	0	A	0	0	0	T	C	A	T	0	G	C	0	A	G	T	T	A	A	C	G	C	A	0	0	A	0	0	0	0	T
	Hap_20				1			1	T	T	0	G	C	0	0	A	0	G	0	A	0	0	0	T	C	A	T	0	G	C	0	A	G	T	T	A	A	C	G	C	A	0	0	A	0	0	0	0	T
	Hap_21			1				1	T	T	0	G	C	0	0	A	0	G	0	A	0	0	0	T	C	A	T	0	G	C	0	A	G	T	T	A	A	C	G	C	A	0	0	A	0	0	0	0	T
	Hap_22				2			2	T	T	0	G	C	0	0	A	0	G	0	A	0	0	0	T	C	A	T	0	G	C	0	A	G	T	T	A	A	C	G	C	A	0	0	A	0	0	0	0	T
	Hap_23				14			14	T	T	0	G	C	0	0	A	0	G	0	A	0	0	0	T	C	A	T	0	G	C	0	A	G	T	T	A	A	C	G	C	A	0	0	A	0	0	0	0	T
	Hap_24				2			2	T	T	0	G	C	0	0	A	0	G	0	A	0	0	0	T	C	A	T	0	G	C	0	A	G	T	T	A	A	C	G	C	A	0	0	A	0	0	-1	0	T
	Hap_25				1			1	T	GT	0	G	C	0	0	A	0	G	0	A	0	0	0	T	C	A	T	0	G	C	0	A	G	T	T	A	A	C	G	C	A	0	0	A	0	0	0	0	T
	Hap_26					1		1	T	G	0	G	C	0	0	A	0	G	0	A	0	0	0	T	C	A	T	0	G	C	0	A	G	T	T	A	A	C	G	C	A	0	0	A	0	0	0	0	T
	Hap_27					1		1	T	G	0	G	C	0	0	A	0	G	0	A	0	0	0	T	C	A	T	0	G	C	0	A	G	T	T	A	A	C	G	C	A	0	0	A	0	0	0	0	T
	Hap_28	1						1	T	G	0	G	C	0	0	A	0	G	0	A	0	0	0	T	C	A	T	0	G	C	0	A	G	T	T	A	A	C	G	C	A	0	0	A	0	0	0	0	T
	Hap_29		1					1	T	G	0	G	C	0	0	A	0	G	0	A	0	0	0	T	C	A	T	0	G	C	0	A	G	T	T	A	A	C	G	C	A	0	0	A	0	0	0	0	T
	Hap_30			1				1	T	T	0	G	C	0	0	A	0	G	0	A	0	0	0	T	C	G	T	0	A	A	0	A	G	T	T	A	A	C	G	C	A	0	0	A	0	0	0	0	T
	Hap_31				1			1	T	T	0	G	C	0	0	A	0	G	0	A	0	0	0	T	C	A	T	0	G	C	0	A	G	T	T	A	A	C	G	C	A	0	0	A	0	0	0	0	T
	Hap_32					1		1	T	G	0	G	C	0	0	A	0	G	0	A	0	0	0	T	C	A	T	0	G	C	0	A	G	T	T	A	A	C	G	C	A	0	0	A	0	0	0	0	T
	Hap_33					3		3	T	G	0	G	C	0	0	A	0	G	0	A	0	0	0	T	C	A	T	0	G	C	0	A	G	T	T	A	A	C	G	C	A	0	0	A	0	0	0	0	T
	Hap_34					1		1	T	G	0	G	C	0	0	A	0	G	0	A	0	0	0	T	C	A	T	0	G	C	0	A	G	T	T	A	A	C	G	C	A	0	0	A	0	0	0	0	T
	Hap_35				1			1	T	T	0	G	C	0	0	A	0	G	0	A	0	0	0	T	C	A	T	0	G	C	0	A	G	T	T	A	A	C	G	C	A	0	0	A	0	0	-1	0	T
	Hap_36				1			1	T	T	0	G	C	0	0	A	0	G	0	A	0	0	0	T	C	A	T	0	G	C	0	A	G	T	T	A	A	C	G	C	A	0	0	A	0	0	0	0	T
	Hap_37				2			2	T	GT	0	G	C	0	0	A	0	G	0	A	0	0	0	T	C	A	T	0	G	C	0	A	G	T	T	A	A	C	G	C	A	0	0	A	0	0	-1	0	T
	Hap_38					1		1	T	N	0	G	C	0	0	A	0	G	0	A	0	0	0	T	C	N	T	0	G	C	0	A	G	T	T	A	A	C	G	C	A	0	0	A	0	0	N	0	T
	Hap_39				1			1	T	T	0	G	C	0	0	A	0	G	0	A	0	0	0	T	C	A	T	0	G	C	0	A	G	T	T	A	A	C	G	C	A	0	0	A	0	0	N	0	T
[truncated: 183 more columns]
