# Supplementary material for: Haplotype Analysis of BADH1 by Next-Generation Sequencing Reveals Association with Salt Tolerance in Rice during Domestication
Source: Int J Mol Sci. 2021 Jul 15;22(14):7578. doi: 10.3390/ijms22147578 (PMC8305476; doi:10.3390/ijms22147578)
Supplement: Supplementary file 1 [file ijms-22-07578-s001.zip › Supplementary Table S5A and B. Haplotypes list for 5 cultivated rice and wild rice.xlsx]

## Sheet: maf.0.03filtering_SNP_region
Supplementary Table S5A. List of haplogroups for selected haplotypes of cultivated rice and 21 wild rice species, representing to the whole SNPs region of BADH1 by filtering miner allele frequency (maf) at 0.03. After filtering, there were totally 116 SNPs detected in the whole BADH1 gene region. Condon changes together with amino acid transition due to functional SNP substitutions were also supp…
Position	23171520	23171522	23171537	23171566	23171600	23171611	23171776	23171863	23171943	23172031	23172150	23172169	23172221	23172233	23172245	23172255	23172293	23172317	23172365	23172399	23172410	23172419	23172439	23172449	23172470	23172471	23172510	23172511	23172522	23172661	23172673	23172708	23172728	23172738	23172779	23172790	23172791	23172810	23172814	23172831	23172999	23173030	23173124	23173166	23173178	23173183	23173224	23173276	23173310
Reference	T	G	G	C	A	G	T	C	T	A	G	T	T	A	A	C	C	A	A	T	C	G	A	G	C	G	C	A	A	C	T	G	G	T	T	T	T	C	G	T	A	G	C	A	T	G	G	A	T
Exon	15	15	15	15	15	15	15	15									13	13				12	12	12	12	12	12	12	12	11	11	11	11										10					9
Amino acid								S -> I									E -> E	I -> I				H -> Y	V -> G	R -> C	V -> I	C -> C	M -> I	M -> K	V -> V	R -> L	Y -> S	I -> I	Q -> K										V -> I					F -> L
Codon								AGC -> ATC									GAG -> GAA	ATT -> ATC				CAC -> TAC	GTA -> GGA	CGT -> TGT	GTT -> ATT	TGC -> TGT	ATG -> ATT	ATG -> AAG	GTT -> GTG	CGA -> CTA	TAT -> TCT	ATC -> ATT	CAA -> AAA										GTT -> ATT					TTT -> TTA
Hap_2																					T
Hap_3
Hap_4
Hap_18		T																															T					G				A					A
Hap_23		T																															T					G				A
Oryza alta-1																													AC																N
Oryza alta-2		N														N																													N
Oryza alta-3		N											N			N																													N
Oryza australiensis-1	N	N							N				N	N		N																													G
Oryza australiensis-2																							AC			GA										TC
Oryza barthii-1																																	T
Oryza barthii-2		T																															T					G				A
Oryza barthii-3																																	T
Oryza brachyantha-1	N	N		N		N			N																												N	N			N
Oryza brachyantha-2	N	N		N		N			N			N																									N				N
Oryza eichingeri-1		N
Oryza eichingeri-2		N
Oryza eichingeri-3		N																						N
Oryza glaberrima-1																																	T
Oryza glaberrima-2		T	GC					CA																								GA	T					G				GA
Oryza glaberrima-3		N																																	N	N
Oryza glumaepatula-1,2,3
Oryza grandiglumis-1		N														N																													N
Oryza grandiglumis-2		N														N																													N
Oryza grandiglumis-3		N														N																													N
Oryza latifolia-1		N											N			N																													N
Oryza latifolia-2		N														N																													N
Oryza latifolia-3		N														N																													N
Oryza longiglumis-1	N	N		N		N													N	N	N													N				N		N
Oryza longiglumis-2	N	N		N		N					N			N						N	N																	N	N	N
Oryza longistaminata-1		N																									CA	AT	AC						N
Oryza longistaminata-2		T		A			A					A												A	T												A		A	TA				AG					C
Oryza longistaminata-3		T		A										G	AG		T														G			G
Oryza malabarensis-1		GT			AG																									CA			T					G				GA
Oryza malampuzhaensis-1		N																											AC																N
Oryza malampuzhaensis-2		N																											AC																N
Oryza malampuzhaensis-3		N																						N					AC																N
Oryza meridionalis-1	C	T		A		T			C		A		A			G		G	G	A		A																			T		T					T
Oryza meridionalis-2	C	T		A		T			C	T	A		A			G		G	G	A		A																			T		T
Oryza minuta-1		N																											AC																N
Oryza minuta-2		N																						A					AC											N					N
Oryza nivara-2		T																															T					G				A				A
Oryza nivara-3		T																															T					G				A
Oryza officinalis-1		N																									A	T	C						N
Oryza officinalis-2,3		T																							T								T					G				A
Oryza punctata-1																													C																G
Oryza punctata-2		N																											AC
Oryza punctata-3		N		N
Oryza rhizomatis-1		N		N
Oryza rhizomatis-2	N	N		N																																		N	N
Oryza rhizomatis-3		N
Oryza ridleyi-1,Oryza_nivara_1
Oryza rufipogon-1		T																															T					G				A
Oryza rufipogon-2		N	N																																C
Oryza rufipogon-3		N	N		N
[truncated: 67 more columns]

## Sheet: maf0.03filterinf_InDel_region
Supplementary Table S5B. List of haplogroups for selected haplotypes of cultivated rice and 21 wild rice species, representing to the whole InDel region of BADH1 by filtering miner allele frequency (maf) at 0.03.
Position	23171527	23171569	23171587	23171601	23171633	23171735	23171760	23171764	23172025	23172351	23172368	23172379	23172380	23172384	23172391	23172902	23172903	23172963	23173324	23173333	23173551	23173586	23173808	23173813	23174068	23174216	23174285	23174458	23174460	23174482	23174555	23174657	23174726	23174738	23175178	23175193	23175199	23175261	23175316	23175318	23175320	23175469	23175528	23175558	23175580	23175581	23175583	23175632	23175659
Reference	TTGCATTC	G	G	GCA	CATATACTGTAATTCATAAGTTGCTATTGCCATGCAAGGCTTATTGTAAGACCGTAAGAGCAACTGTAA	GGTTGA	CGT	CT	T	G	CA	TTAA	TAA	T	T	T	T	AAG	TACAC	AATTAGCTAGCAATACTTACTTGAATAAC	GA	AC	AATAT	GTGATAC	C	C	GA	A	CACGTACAAAAGGTAAACA	C	G	TTG	C	CT	GGTGGGCACCAA	TTAAA	GCACCGATCAAGTTATAC	CATTTAA	A	T	TG	AT	AT	TGTGCACCCCCTTCC	A	T	T	GA	G
Exon	15	15	15	15	15	15	15	15
Hap_2
Hap_3																					1
Hap_4
Hap_18													-2
Hap_23																					1
Oryza alta-1		N		N									N	N	N	N	N				N				N					N	N		N		N	N	N	N	N	N	N							N
Oryza alta-2		N											N	N	N	N	N				N				N			N	N	N	N		N		-11	-4	-17	N	N	N	N							N
Oryza alta-3		N			N								N	N	N	N	N				N				N			N	N	N	N		N		N		N	N		N	N							N
Oryza australiensis-1	N				N										N	N	N				N				N			N	N	N		N	N						N	N	N							N
Oryza australiensis-2												-3																															-1
Oryza barthii-1				-2																	2
Oryza barthii-2													N	N
Oryza barthii-3				-2														-2			1
Oryza brachyantha-1	N	N	N	N	N	N					N		N	N			N	N		N	N	N			N			N	N		N	N	N	N	N				N		N	N						N
Oryza brachyantha-2	N	N	N	N	N	N					N		N	N			N	N		N	N	N			N			N	N		N	N	N	N	N				N		N							N	N
Oryza eichingeri-1												N									N						N																	N
Oryza eichingeri-2		1		N	N						N		N	N	N	N	N				N				N						N				N	N	N	N		N	N								N
Oryza eichingeri-3		N			N					N	N		N	N	N	N	N				N				N				N		N				N	N	N	N		N	N
Oryza glaberrima-1				-2																	1
Oryza glaberrima-2																					1						-1
Oryza glaberrima-3												N									2						N																	N
Oryza glumaepatula-1,2,3																														1
Oryza grandiglumis-1		N			N								N		N	N	N				N				N			N	N	N	N		N		-11	-4	-17	N	N	N	N							N
Oryza grandiglumis-2		N			N									N	N	N	N								N			N	N	N	N		N		N	N		N	N	N	N							N
Oryza grandiglumis-3		N											N	N	N	N	N				N				N			2	-18	N	N		N		N	N	N	N	N	N	N							-1
Oryza latifolia-1		N			N								N	N	N	N	N				N				N			2	-18	N	N		N		-11	-4	-17	-6	N	N	N							N
Oryza latifolia-2		N			N								N	N	N	N	N				N				N			N	N	N	N		N		N	N	N	N	N	N	N							N
Oryza latifolia-3		N			N									N	N	N	N				N				N			2	-18	N	N		N		-11	-4	-17	N	N	N	N							N
Oryza longiglumis-1	N	N	N	N	N	N				N	N		N	N		N	N				N				N				N	N	N	N	N	N	N					N	N	N						N	N
Oryza longiglumis-2	N		N	N	N	N					N		N	N		N	N				N				N				N		N		N	N	N					N	N	N						N	N
Oryza longistaminata-1																					N						N																	N
Oryza longistaminata-2	-7		2			-5							2	4							1	-1																											1
Oryza longistaminata-3	-7		2		N								2			3	4		-4	-28	-1										1		4	-1						5	N	-1						-1	1
Oryza malabarensis-1							-2	-1													1
Oryza malampuzhaensis-1		N												N	N	N	N				N				N					N	N		N		-11	-4	-17	N	N	N	N							N
Oryza malampuzhaensis-2		N											N	N	N	N	N				N				N					N	N		N		-11	-4		N	15		-1							N
Oryza malampuzhaensis-3		N												N	N	N	N				N				N					N	N		N		N	N	N	N	N	N	N							N
Oryza meridionalis-1									1	8					1	3	4						-4	-6	1							-2
Oryza meridionalis-2									1	8	-1			N	1	3	4						-4	-6	1							-2
Oryza minuta-1		N											N	N	N	N	N				N				N			N	N	N	N		N		N	N	N	N	15		-1
Oryza minuta-2		N		N	-68									N	N	N	N				N				N					N	N				-11	-4	N	N	15		-1
Oryza nivara-2
Oryza nivara-3																					1
Oryza officinalis-1												N									N						N																	N
Oryza officinalis-2,3																					1																							-14	1	7	4
Oryza punctata-1	N			N										N	N	N	N								N			N	N	N		N	N						N	N	N							N
Oryza punctata-2		N		N	N									N	N	N	N				N				N			N	N	N	N		N		N	N	N	N	15		-1							N
Oryza punctata-3	N	1		N	N					N	N		N	N	N	N	N				N				N			N	N		N				-11	-4	-17	N		N	N
Oryza rhizomatis-1		N								N	N		N	N	N	N	N				N				N			N	N		N	N			N	N	N	N		N	N								N
Oryza rhizomatis-2	N	N			N					N	N		N	N	N	N	N				N				N			N	N		N				N	N	N	-6		N	N							N	N
Oryza rhizomatis-3	N	N			N					N	N		N	N	N	N	N				N				N			N	N		N				N	N	N	N		N	N							N	N
Oryza ridleyi-1,Oryza_nivara_1																										1
Oryza rufipogon-1																					1
Oryza rufipogon-2												N									N						N																	N
Oryza rufipogon-3							N					N									N																						N
[truncated: 28 more columns]
