# Supplementary material for: Haplotype Analysis of BADH1 by Next-Generation Sequencing Reveals Association with Salt Tolerance in Rice during Domestication
Source: Int J Mol Sci. 2021 Jul 15;22(14):7578. doi: 10.3390/ijms22147578 (PMC8305476; doi:10.3390/ijms22147578)
Supplement: Supplementary file 1 [file ijms-22-07578-s001.zip › Supplementary Table S6. The rice accessions with their mean values for 8 phenotypees.xlsx]

## Sheet: Mean Values
Supplementary Table S6. Recorded mean values of 8 different plant parameters under salt treatment (200 mM NaCl). During measuring period, the samples were stored in incubators at 30°C with 40% relative humidity for 10 days. Once the plumule emergence was 2 mm long, it was started measuring of germination index (GI) and root length (RL) and shoot length (SL) were measured after 10 days. Total dry …
No.	Acc No.	RGP	RGE	RGI	RMGT	RGR	RRL	RSL	RTDW
1	RWG-007	0.62069	0.0357143	0.291142	2.21867	0.450721	0.0669637	0.0764719	1.17571
2	RWG-031	0.827586	0	0.314072	2.67781	0.37344	0.0499711	0.0583722	1.32316
3	RWG-105	0.911111	0.155556	0.57037	1.80321	0.554566	0.0335759	0.196822	1.35772
4	RWG-042	0.733333	0.116667	0.402057	1.73717	0.575648	0.140041	0.146095	1.21358
5	RWG-110	0.388889	0.015873	0.183007	2.10256	0.47561	0.0309876	0.187293	1.36257
6	RWG-008	0.644444	0.0888889	0.338896	2.07419	0.482116	0.0697582	0.0996372	1.2894
7	RWG-023	0.309524	0.102564	0.158764	1.92844	0.518553	0.139855	0.178415	1.24729
8	RWG-037	0.555556	0.091954	0.281125	2.11304	0.473251	0.0535169	0.116319	1.19618
9	RWG-038	0.592593	0.12	0.273105	2.13889	0.467532	0.0892057	0.1605	1.24936
10	RWG-043	1	0.533333	0.707143	1.66296	0.601336	0.139865	0.269271	1.2629
11	RWG-053	0.855556	0.266667	0.547222	1.77489	0.563415	0.043611	0.196138	1.41587
12	RWG-108	0.133333	0	0.0584291	2.21774	0.450909	0.0238678	0.0384398	1.19854
13	RWG-113	0.822222	0.4	0.628148	1.5	0.666667	0.0316144	0.141712	1.33047
14	RWG-295	0.388889	0	0.134444	3.02857	0.330189			1.38532
15	RWG-003	0.222222	0.0333333	0.110225	2.15152	0.464789	0.0988989	0.0948448	1.42109
16	RWG-005	0.642857	0.0769231	0.317403	2.08405	0.479836	0.267046	0.111025	1.30229
17	RWG-006	0.83908	0.344828	0.54548	1.66109	0.602015	0.0844231	0.188096	1.16589
18	RWG-010	0.488889	0.0574713	0.253175	2.08935	0.478618	0.0899514	0.118851	1.23358
19	RWG-013	0.322222	0	0.161481	2.14444	0.466321	0.0197092	0.0678203	1.43707
20	RWG-021	0.788889	0.0555556	0.268545	3.07939	0.32474	0.0749333	0.15403	1.2
21	RWG-022	0.988889	0.788889	0.637001	1.70899	0.585139	0.17092	0.339208	1.25244
22	RWG-030	0.988889	0.344444	0.446906	2.29877	0.435016	0.166437	0.0766566	1.41241
23	RWG-034	0.977778	0.388889	0.517254	2.03611	0.491131	0.0885644	0.132896	1.2403
24	RWG-036	0.877778	0.244444	0.488095	2.03405	0.491631	0.0507136	0.0851124	1.18795
25	RWG-039	0.471264	0.0493827	0.245189	1.96028	0.510132	0.183966	0.17498	1.18035
26	RWG-041	0.488095	0.0238095	0.20144	2.48337	0.402679	0.110528	0.0648058	1.20369
27	RWG-044	0.604938	0.0493827	0.282619	2.21027	0.452433	0.0802408	0.135624	1.16257
28	RWG-047	0.977778	0.166667	0.474603	2.20833	0.45283	0.0644725	0.0946923	1.30064
29	RWG-048	0.708333	0.138889	0.363073	2.14515	0.466168	0.0590292	0.102069	1.15943
30	RWG-049	0.678571	0.297619	0.40544	1.90208	0.52574	0.0361733	0.115333	1.28587
31	RWG-054	0.83908	0	0.320721	2.46547	0.405602	0.0192851	0.147042	1.26199
32	RWG-056	0.866667	0.0555556	0.403333	2.32906	0.429358	0.0312825	0.142392	1.47002
33	RWG-060	0.83908	0.0357143	0.372203	2.30326	0.434166	0.0229363	0.0694632	1.15621
34	RWG-061	0.866667	0.2	0.446667	2.31624	0.431734	0.0448851	0.12491	1.27455
35	RWG-064	0.642857	0.0987654	0.315629	2.2792	0.43875	0.0474644	0.265221	1.41358
36	RWG-067	0.944444	0.811111	0.851111	1.32941	0.752212	0.0139154	0.131044	1.36791
37	RWG-068	0.522222	0.0689655	0.208191	2.81641	0.355062	0.0160256	0.0481333	1.26512
38	RWG-070	0.977778	0.188889	0.571389	1.875	0.533333	0.051634	0.294669	1.38998
39	RWG-071	0.712644	0.206897	0.358621	2.65591	0.376518	0.0384449	0.0616946	1.23807
40	RWG-072	0.2	0.0222222	0.0959259	2.79365	0.357955	0.0167053	0.0729411	1.20607
41	RWG-073	1	0.577778	0.704444	1.98519	0.503731	0.0189125	0.12734	1.4446
42	RWG-085	0.955556	0.155556	0.558519	1.96124	0.509881	0.0342633	0.0850173	1.29798
43	RWG-086	0.241379	0	0.10475	2.35172	0.425221	0.0199757	0.0521157	1.2194
44	RWG-109	0.977778	0.244444	0.668148	1.625	0.615385	0.035219	0.11713	1.26816
45	RWG-112	0.911111	0.177778	0.512593	2.03659	0.491018	0.0272712	0.113042	1.23429
46	RWG-116	0.977011	0.218391	0.590805	1.82353	0.548387	0.0240011	0.163819	1.26883
47	RWG-118	0.9	0.0111111	0.431111	2.16872	0.461101	0.0126093	0.0800387	1.40795
48	RWG-119	0.988889	0.777778	0.912593	1.12921	0.885572	0.0385684	0.0917874	1.23939
49	RWG-120	0.977778	0.9	0.951852	1.03977	0.961749	0.0270733	0.173651	1.25693
50	RWG-121	0.966667	0.255556	0.597778	1.82759	0.54717	0.019663	0.102546	1.36059
51	RWG-122	0.977011	0.114943	0.532184	1.97647	0.505952	0.0183198	0.104702	1.33406
52	RWG-123	0.866667	0.177778	0.495556	2	0.5	0.0204367	0.102338	1.36911
53	RWG-124	0.877778	0.244444	0.545556	1.83966	0.543578	0.0191673	0.146155	1.3477
54	RWG-125	0.788889	0.311111	0.47	2.21596	0.451271	0.018941	0.0640444	1.32599
55	RWG-126	0.788889	0.255556	0.436667	2.36574	0.422701	0.0197071	0.0500325	1.36868
56	RWG-131	1		1	1	1	0.0657954	0.159775	1.33876
57	RWG-137	0.536232		0.536232	1	1
58	RWG-163	0.822222		0.644444	1.43243	0.698113	0.0370053		1.21961
59	RWG-164	0.722222		0.372222	1.96923	0.507812	0.0251046		1.20052
60	RWG-165	0.833333		0.533333	1.72	0.581395	0.071607		1.28881
61	RWG-166	0.611111		0.383333	1.74545	0.572917	0.0427583		1.30305
62	RWG-168	0.466667		0.277778	1.80952	0.552632	0.0334458		1.22375
63	RWG-204	0.122222		0.0722222	1.81818	0.55	0.0247365		1.16332
64	RWG-205	0.477778		0.322222	1.65116	0.605634	0.0313875		1.19165
65	RWG-206	0.644444		0.433333	1.65517	0.604167	0.0289899		1.24535
66	RWG-207	0.482759		0.293103	1.78571	0.56	0.0317758		1.19725
67	RWG-208	0.844444		0.646914	1.42105	0.703704	0.0259542		1.36258
68	RWG-209	0.758621		0.428664	1.78412	0.560502	0.0274025		1.21843
69	RWG-210	0.911111		0.698765	1.41951	0.704467	0.0876447		1.20508
70	RWG-211	0.255556		0.183333	1.53043	0.653409	0.0383726		1.24706
71	RWG-238	1		0.925926	1.13333	0.882353	0.0462832		1.3152
72	RWG-242	0.966667		0.685185	1.52414	0.656109	0.0252517		1.16709
73	RWG-243	0.833333	0.0666667	0.387778	2.41778	0.413603	0.0454305		1.2291
74	RWG-244	0.977778	0.178571	0.578161	1.80043	0.555424	0.0928873		1.22794
75	RWG-251	0.922222	0.0888889	0.445556	2.33735	0.427835	0.052428		1.24933
76	RWG-272	0.888889		0.541358	1.7175	0.582242	0.0398227		1.21089
77	RWG-276	0.922222	0.16092	0.516384	1.9899	0.502539	0.0518283		1.32289
78	RWG-292	0.940476	0.0714286	0.405952	2.63291	0.379808	0.0375043		1.28563
79	RWG-297	0.811111	0.0222222	0.325556	2.72146	0.36745	0.0344486		1.29401
80	RWG-299	0.844444	0.149425	0.489266	1.87182	0.53424	0.0302329		1.47491
81	RWG-332	0.345679	0	0.219114	1.56696	0.638177	0.0152271		1.34835
82	RWG-333	0.57971		0.492754	1.25	0.8	0.0399606		1.28113
83	RWG-385	0.0555556		0.0555556	1	1	0.0302306		1.15815
84	RWG-386	0.0344828		0.0344828	1	1			1.22273
85	RWG-387	0.229885	0	0.0861111	2.42906	0.411682			1.1504
86	RWG-388	0	0	0					1.15753
87	RWG-389	0	0	0					1.21381
88	RWG-390	0.0574713	0	0.0248366	2.25556	0.44335	0.0306098		1.12341
89	RWG-391	0.154762	0	0.0576923	2.64744	0.377724	0.0226978		1.1303
90	RWG-392	0.0111111	0	0.00526316	1.92308	0.52			1.19869
91	RWG-393	0.0888889	0.0119048	0.0402299	2.53906	0.393846	0.0208127		1.19518
92	RWG-394	0.0444444	0	0.0193939	2.28571	0.4375			1.16947
93	RWG-395	0.0777778	0	0.0419753	2.08333	0.48			1.16053
94	RWG-396	0.0238095	0	0.0116959	1.89831	0.526786			1.18893
95	RWG-397	0.155556	0	0.0610169	2.67281	0.374138	0.0194121		1.3105
96	RWG-398	0.1	0	0.0392857	2.54902	0.392308	0.0245848		1.1798
97	RWG-399	0.214286	0	0.0765432	2.83457	0.352787	0.0314795		1.13565
98	RWG-400	0.0595238	0	0.0372549	1.568	0.637755			1.15389
99	RWG-401	0.244444	0	0.145098	1.65584	0.603922			1.13045
100	RWG-402	0.103448	0	0.0466667	2.14815	0.465517			1.13488
101	RWG-403	0.047619	0	0.0217054	2.04878	0.488095			1.16691
102	RWG-404	0.229885	0	0.124242	1.75349	0.570292			1.24916
103	RWG-405	0.602564		0.474359	1.35461	0.73822	0.0396483		1.28441
104	RWG-406	0.9		0.731111	1.31276	0.761755	0.0623319		1.327
105	RWG-407	0.955556		0.835556	1.2093	0.826923	0.144283		1.30299
106	RWG-410	0.277778		0.18	1.58667	0.630252	0.0353868		1.33569
107	RWG-411	0.955556		0.888889	1.11628	0.895833	0.115437		1.22461
108	RWG-416	0.355556	0.0888889	0.201481	2.03125	0.492308	0.0458887		1.27554
109	RWG-417	0.255556	0	0.110617	2.31522	0.431925			1.25353
110	RWG-421	0.788889	0.211111	0.467407	1.91901	0.521101	0.043616		1.22372
111	RWG-426	0.858974	0.44	0.62853	1.57004	0.636927	0.0738338		1.22135
112	RWG-427	0.577778	0.288889	0.411358	1.68269	0.594286	0.0494923		1.39524
113	RWG-018	0.873563	0.0804598	0.417723	2.27647	0.439278	0.109076	0.192954	1.42138
114	RWG-019	0.666667	0.0617284	0.319709	2.08081	0.480583	0.0551028	0.171293	1.29255
115	RWG-032	0.977011	0.413793	0.498825	2.01782	0.495586	0.0670213	0.184477	1.28686
116	RWG-040	0.933333	0.2	0.580952	1.7019	0.58758	0.0322628	0.151071	1.23717
117	RWG-045	1	0.366667	0.564683	1.94815	0.513308	0.0673592	0.204736	1.30085
118	RWG-051	0.888889	0.194444	0.551111	1.63659	0.611028	0.0313917	0.123978	1.25464
119	RWG-055	1.03846	0	0.3875	2.68313	0.372699	0.0243808	0.165989	1.23276
120	RWG-057	1	0.222222	0.513889	2.2963	0.435484	0.0322222	0.172699	1.37159
121	RWG-058	0.908046	0.241379	0.489655	2.24051	0.446328	0.033234	0.269839	1.33761
122	RWG-066	0.7	0.2	0.390833	2.20833	0.45283	0.0354119	0.160725	1.21393
123	RWG-081	0.851852	0.419753	0.549383	2.18357	0.457965	0.040199	0.152703	1.31217
124	RWG-089	0.922222	0.166667	0.548276	1.77711	0.562712	0.0164064	0.133896	1.27488
125	RWG-090	0.908046	0.16092	0.511494	1.99156	0.502119	0.0351425	0.158859	1.1853
126	RWG-098	0.954023	0.494253	0.632184	2.1245	0.470699	0.0356044	0.210358	1.34806
127	RWG-101	0.166667	0	0.054023	3.04167	0.328767	0.0269049	0.035115	1.28903
128	RWG-102	1	0.246914	0.62963	1.7561	0.569444	0.0278545	0.241305	1.35135
129	RWG-106	1	0.1	0.547778	1.91481	0.522244	0.0310369	0.174518	1.37585
130	RWG-107	0.988889	0.037037	0.523977	1.86925	0.534973	0.0219358	0.13436	1.26524
131	RWG-132	0.488889	0.0444444	0.187778	2.91667	0.342857	0.0390704	0.11422	1.25786
132	RWG-167	0.816092		0.816092	1	1	0.0273016		1.26453
133	RWG-202	0.935897	0.320513	0.607692	1.80365	0.55443	0.0252445		1.29472
134	RWG-203	0.948718	0.0266667	0.363399	2.78478	0.359094	0.0236181		1.43358
135	RWG-296	0.9	0.0444444	0.427778	2.27984	0.438628	0.0221592		1.311
136	RWG-415	0.8	0.388889	0.587778	1.56944	0.637168	0.0214804		1.25302
137	RWG-419	0.816092	0.264368	0.508046	1.93897	0.515738	0.0253915		1.3187
138	RWG-420	0.855556	0.0804598	0.454237	1.99832	0.500419	0.0216201		1.24555
139	RWG-001	1.03704	0.185185	0.563597	1.94019	0.515414	0.0596674	0.16414	1.37088
140	RWG-002	0.666667	0.037037	0.304071	2.26263	0.441964	0.0907637	0.138561	1.40001
141	RWG-004	0.75	0.047619	0.321531	2.44444	0.409091	0.0776072	0.13995	1.29219
142	RWG-009	0.644444	0.047619	0.299964	2.16438	0.462026	0.0466397	0.167349	1.39886
143	RWG-011	0.988506	0.517241	0.667447	1.54651	0.646617	0.106246	0.314031	1.4069
144	RWG-012	0.666667	0	0.337399	2.00952	0.49763	0.0379327	0.125834	1.28048
145	RWG-014	0.955556	0.322222	0.578778	1.75569	0.569578	0.0716036	0.186651	1.46358
146	RWG-015	0.793103	0.45977	0.554611	1.5619	0.640244	0.0870248	0.235155	1.41702
147	RWG-016	0.940476	0.142857	0.524376	1.94583	0.513919	0.0480397	0.1229	1.54465
148	RWG-017	0.75	0.047619	0.400393	1.97596	0.506083	0.0458293	0.152689	1.31405
149	RWG-020	0.766667	0.0555556	0.364272	2.20227	0.454077	0.0381559	0.171298	1.39897
150	RWG-024	0.966667	0.288889	0.529579	1.95963	0.5103	0.0813331	0.241323	1.20833
151	RWG-025	0.965517	0.264368	0.461228	2.09116	0.478204	0.0882024	0.319294	1.45648
152	RWG-026	0.866667	0.45977	0.427784	1.97676	0.505877	0.0704316	0.202729	1.27512
153	RWG-027	0.944444	0.8	0.538452	2.15358	0.464343	0.160142	0.407131	1.41504
154	RWG-028	0.942529	0.908046	0.595402	1.67073	0.59854	0.167535	0.361238	1.21702
155	RWG-029	0.988889	0.777778	0.541703	1.81923	0.549682	0.102779	0.256379	1.31002
156	RWG-033	0.833333	0.277778	0.472519	1.86824	0.535264	0.0819185	0.139932	1.19477
157	RWG-035	1.02299	0.632184	0.644962	1.65494	0.604252	0.0790974	0.267335	1.51657
158	RWG-046	0.869048	0.119048	0.408872	2.22831	0.44877	0.0754331	0.188732	1.16956
159	RWG-050	0.922222	0.214286	0.489596	1.93501	0.516792	0.0678998	0.197764	1.67041
160	RWG-052	0.736111	0.194444	0.434568	1.92453	0.519608	0.0392113	0.125863	1.23372
161	RWG-059	0.644444	0	0.23913	2.55517	0.391363	0.109856	0.129011	1.32506
162	RWG-062	0.666667	0.0777778	0.295278	2.51667	0.397351	0.0243311	0.146269	1.38995
163	RWG-063	0.977011	0.310345	0.560345	2.13725	0.46789	0.0650475	0.167982	1.27609
164	RWG-065	0.966667	0.0333333	0.3825	2.61686	0.382138	0.0311486	0.129049	1.29625
165	RWG-069	0.977778	0.666667	0.76	1.74242	0.573913	0.02307	0.105078	1.43189
166	RWG-074	0.988889	0.4	0.576667	2.38951	0.418495	0.0175318	0.187409	1.49856
167	RWG-075	1	0.811111	0.867778	1.44074	0.694087	0.029631	0.174133	1.53423
168	RWG-076	0.988889	0.544444	0.677778	2.04869	0.488117	0.0204057	0.165646	1.39061
169	RWG-077	0.788889	0.388889	0.508889	2.1831	0.458065	0.014442	0.0864874	1.36185
170	RWG-078	0.911111	0.366667	0.53	2.39431	0.417657	0.0285152	0.190558	1.45635
171	RWG-079	0.822222	0	0.246667	3.33333	0.3	0.0336137	0.192117	1.42514
172	RWG-080	0.911111	0.264368	0.463026	2.48554	0.402327	0.0300269	0.178969	1.38045
173	RWG-082	0.766667	0.244444	0.401111	2.58937	0.386194	0.0224168	0.0869064	1.57897
174	RWG-083	0.8	0.1	0.31	3.04167	0.328767	0.0261416	0.10577	1.50273
175	RWG-084	0.933333	0.0444444	0.395556	2.61905	0.381818	0.0201284	0.143217	1.45186
176	RWG-087	0.586207	0.0114943	0.262069	2.39869	0.416894	0.0249589	0.133795	1.52049
177	RWG-088	0.91954	0.0804598	0.503448	1.93004	0.518124	0.0193551	0.155714	1.52344
178	RWG-091	0.922222	0.0555556	0.315556	3.19277	0.313208	0.0176131	0.129109	1.32394
179	RWG-092	0.177778	0	0.0620155	2.27273	0.44	0.0244342	0.089593	1.2537
180	RWG-093	0.955556	0.122222	0.372222	3.03488	0.329502	0.0323608	0.14795	1.21875
181	RWG-094	1.01149	0.390805	0.577011	2.43182	0.411215	0.0255637	0.233148	1.3804
182	RWG-095	0.966667	0.877778	0.904444	1.21456	0.823344	0.0308198	0.172981	1.40272
183	RWG-096	0.955556	0.355556	0.535556	2.46512	0.40566	0.148394	0.262165	1.50287
184	RWG-097	1.01149	0.440476	0.616019	2.1771	0.459326	0.0441384	0.204898	1.38009
185	RWG-099	0.955556	0.555556	0.675556	1.97674	0.505882	0.0220747	0.157087	1.31411
186	RWG-100	0.655556	0.126437	0.288965	2.68915	0.371865	0.040604	0.20145	1.57548
187	RWG-103	0.966667	0.0444444	0.508889	1.9697	0.507692	0.0186219	0.198657	1.47067
188	RWG-104	0.827586	0.0114943	0.318391	2.80093	0.357025	0.0218827	0.129663	1.33489
189	RWG-111	1	0.2	0.6	1.8	0.555556	0.0715337	0.244872	1.30655
190	RWG-114	0.965517	0.0804598	0.513793	1.98016	0.50501	0.015615	0.124971	1.32949
191	RWG-115	0.788889	0.202381	0.478161	1.8618	0.537116	0.029364	0.174713	1.44836
192	RWG-117	0.977011		1.36322	0.807843	1.23786	0.0370831	0.337596	1.28347
193	RWG-127	0.922222	0.233333	0.46	2.5261	0.395866	0.0164064	0.142121	1.36797
194	RWG-128	0.977778	0.266667	0.502963	2.46212	0.406154	0.025902	0.0930646	1.31977
195	RWG-129	0.966667	0.733333	0.810741	1.48659	0.67268	0.0271343	0.227382	1.32982
196	RWG-130	0.188889	0.0888889	0.125556	2.12963	0.469565	0.0297665	0.077838	1.35528
197	RWG-133	0.977778	0.433333	0.614815	2.11364	0.473118	0.0249833	0.160545	1.43131
198	RWG-134	0.940476	0.0952381	0.37619	2.80591	0.356391	0.0198714	0.12193	1.35034
199	RWG-135	1.01235	0.282051	0.531646	2.29352	0.43601	0.0219331	0.122986	1.21703
200	RWG-136	0.866667	0.188889	0.413704	2.57692	0.38806	0.0176875	0.117543	1.42488
201	RWG-138	0.655172	0.130435	0.386667	1.93743	0.516147	0.0439143		1.30746
202	RWG-139	0.896552	0.16092	0.411494	2.72016	0.367625	0.0298693		1.37072
203	RWG-140	0.885057	0	0.265517	3.33333	0.3	0.0221541		1.30898
204	RWG-141	0.911111	0	0.331667	2.76423	0.361765	0.0237406		1.19813
205	RWG-142	0.928571	0.0123457	0.364774	2.44181	0.409532	0.0208333		1.35001
206	RWG-143	0.688889	0	0.252174	2.59355	0.385572	0.0252687		1.3751
207	RWG-144	0.888889	0.0111111	0.338611	2.6625	0.375587	0.0171836		1.37631
208	RWG-145	0.975309	0	0.368519	2.68333	0.372671	0.0230625		1.29785
209	RWG-146	0.873563	0.0123457	0.346246	2.40355	0.416051	0.0208683		1.31547
210	RWG-147	0.888889	0	0.354667	2.29286	0.436137	0.0215911		1.36729
211	RWG-148	0.922222	0	0.348936	2.56436	0.38996	0.0203885		1.34533
212	RWG-149	0.911111	0	0.339167	2.69106	0.371601	0.0242069		1.37863
213	RWG-150	0.873563	0.0119048	0.345668	2.50946	0.398492	0.0243844		1.43848
214	RWG-151	0.933333	0.0574713	0.493785	1.93932	0.515644	0.0142419		1.35896
215	RWG-152	0.933333	0	0.457143	2.01681	0.495833	0.0326067		1.35091
216	RWG-153	0.528736	0.025641	0.239316	2.25696	0.443075	0.0316772		1.45899
217	RWG-154	0.988095	0.0119048	0.47381	2.16466	0.461967	0.0204906		1.52507
218	RWG-155	0.965517	0	0.464368	2.12698	0.470149	0.0233812		1.41067
219	RWG-156	0.987654	0.138889	0.585621	1.7025	0.587372	0.0279055		1.06622
220	RWG-157	0.851852	0.037037	0.42716	2.09179	0.47806	0.0192797		1.38958
221	RWG-158	0.851852	0.025641	0.404309	2.13439	0.468519	0.0252583		1.53027
222	RWG-159	0.885057	0.0344828	0.455172	1.99567	0.501085	0.0177701		1.40074
223	RWG-160	0.777778	0	0.275641	2.84729	0.351211	0.0152719		1.44573
224	RWG-161	0.876543		0.876543	1	1	0.0340426		1.20263
225	RWG-162	0.678571		0.678571	1	1	0.0223475		1.33635
226	RWG-169	0.735632		0.735632	1	1	0.0325538		1.34568
227	RWG-170	0.701149		0.701149	1	1	0.0468655		1.36727
228	RWG-171								1.12384
229	RWG-172	0.822222		0.822222	1	1	0.0210622		1.40535
230	RWG-173	0.91954		0.91954	1	1	0.0258346		1.39444
231	RWG-174	0.816667		0.816667	1	1	0.267857		1.01473
232	RWG-175
233	RWG-176	0.944444	0.298851	0.611299	1.74573	0.572826	0.0267905		1.35637
234	RWG-177	0.781609	0.153846	0.455758	1.86581	0.535961	0.0227949		1.42136
235	RWG-178	0.988095	0.0119048	0.435714	2.42169	0.412935	0.0217316		1.39645
236	RWG-179	0.294872	0.0166667	0.152047	1.88783	0.52971	0.0243525		1.274
237	RWG-180	0.9	0.2	0.532222	1.90947	0.523707	0.0233905		1.37583
238	RWG-181	0.714286	0.0119048	0.322619	2.36111	0.423529	0.0207308		1.48709
239	RWG-182	0.724638	0.0454545	0.348148	2.2425	0.445931	0.0264299		1.31127
240	RWG-183	0.962963	0.560606	0.779592	1.30168	0.768236	0.0202376		1.34278
241	RWG-184	0.740741	0.0128205	0.350943	2.19107	0.456398	0.022129		1.4583
242	RWG-185	1	0.230769	0.612579	1.77778	0.5625	0.0176478		1.36542
243	RWG-186	0.804598	0.298851	0.551724	1.62857	0.614035	0.0230541		1.46915
244	RWG-187	1.03571	0.833333	0.929762	1.22605	0.815625	0.0206519		1.41416
245	RWG-188	0.855556	0.377778	0.61	1.61039	0.620968	0.0277553		1.38908
246	RWG-189	0.869048	0.0617284	0.392727	2.44686	0.408687	0.0206571		1.40913
247	RWG-190	0.952381	0.678571	0.810714	1.32083	0.757098	0.0313258		1.37636
248	RWG-191	0.877778	0.0777778	0.411111	2.41772	0.413613	0.0186779		1.37395
249	RWG-192	1.02299	0.126437	0.570115	1.90637	0.524558	0.0210606		1.36746
250	RWG-193	0.533333	0	0.18705	2.68868	0.37193			1.36238
251	RWG-194	0.911111	0.2	0.551111	1.81301	0.55157	0.0226433		1.41433
252	RWG-195	0.935897	0.230769	0.570513	1.84475	0.542079	0.0240597		1.39805
253	RWG-196	1.02564	0	0.433333	2.51667	0.397351	0.0166569		1.31572
254	RWG-197	0.797619	0	0.401449	1.89893	0.526613	0.018011		1.34367
255	RWG-198	0.1	0	0.0575397	1.66667	0.6	0.0158643		1.30138
256	RWG-199	0.988506	0	0.432749	2.38295	0.419649	0.0367264		1.34806
257	RWG-200	0.857143	0	0.339394	2.64623	0.377896	0.0228191		1.4048
258	RWG-201	0.609195	0	0.194253	3.20755	0.311765	0.0188174		1.29515
259	RWG-212	0.703704	0.0493827	0.302469	2.63158	0.38	0.0205824		1.4682
260	RWG-213	0.901235	0.148148	0.485185	2.12785	0.469957	0.0451006		1.52619
261	RWG-214	0.876543	0.153846	0.455006	2.16933	0.460971	0.0307808		1.4856
262	RWG-215	0.962963	0.148148	0.54321	1.93162	0.517699	0.0241919		1.64593
263	RWG-216	0.701149	0.0119048	0.28033	2.56418	0.389988	0.0237918		1.51318
264	RWG-217	0.7	0.0333333	0.262222	2.94709	0.339318	0.023338		1.41811
265	RWG-218	0.988095	0.690476	0.834524	1.33333	0.75	0.0196249		1.55256
266	RWG-219	0.839506	0	0.368794	2.21107	0.452269	0.0259971		1.45653
267	RWG-220	0.850575	0.0114943	0.378161	2.4009	0.41651	0.0243124		1.62224
268	RWG-221	1	0.0689655	0.542373	1.87097	0.534483	0.0205247		1.59123
269	RWG-222	0.148148	0.0222222	0.0777778	1.94231	0.514851	0.0150318		1.31373
270	RWG-223	0.793103	0	0.32494	2.43508	0.410664	0.0213049		1.47959
271	RWG-224	0.911111	0	0.414286	2.20947	0.452597	0.0328959		1.39666
272	RWG-225	0.311111	0.0416667	0.186594	1.58801	0.629719	0.0228876		1.256
273	RWG-226	0.988506	0	0.393404	2.53983	0.393727	0.0177359		1.37816
274	RWG-227	0.83908	0	0.330447	2.20355	0.453813	0.0180165		1.40302
275	RWG-228	0.666667	0	0.245333	2.46667	0.405405	0.0272537		1.30964
276	RWG-229	0.505747	0	0.207092	2.26288	0.441915	0.0288631		1.42025
277	RWG-230	0.922222	0.0114943	0.458757	2.03265	0.491969	0.0214984		1.52946
278	RWG-231	0.877778	0	0.417857	2.09233	0.477936	0.01559		1.42413
279	RWG-232	0.869048	0	0.437179	1.94178	0.514991	0.0243276		1.61646
280	RWG-233	1	0.0555556	0.516667	2.01852	0.495413	0.0190343		1.39069
281	RWG-234	0.892857	0	0.383333	2.15911	0.463154	0.0258997		1.37086
282	RWG-235	0.942529	0.0119048	0.45731	2.11016	0.473897	0.0240315		1.3622
283	RWG-236	0.644444	0	0.308148	1.96169	0.509766	0.0247361		1.25608
284	RWG-237	0.885057	0.0114943	0.429885	2.12554	0.470468	0.0224838		1.49473
285	RWG-239	0.827586	0.0119048	0.40636	2.0096	0.49761	0.0221811		1.57374
286	RWG-240	0.862069	0.0533333	0.490123	1.77279	0.564082	0.0460613		1.38218
287	RWG-241	1.05333	0	0.493056	2.1644	0.462022	0.0551459		1.27966
288	RWG-245	1.03448	0	0.514943	2.01481	0.496324	0.0274203		1.52635
289	RWG-246	0.952381	0.0238095	0.494048	1.97531	0.50625	0.0362957		1.60209
290	RWG-247	0.911111	0.0114943	0.457627	2.00236	0.499411	0.0363991		1.60271
291	RWG-248	0.933333	0	0.455172	2.05357	0.486957	0.0446125		1.51742
292	RWG-249	1.0119	0	0.465432	2.21804	0.450849	0.0587968		1.46677
293	RWG-250	0.888889	0.0114943	0.441808	2.03629	0.491089	0.0600625		1.46614
294	RWG-252	0.944444	0	0.414444	2.40784	0.415309	0.0270522		1.48119
295	RWG-253	0.933333	0	0.377011	2.55952	0.390698	0.0220872		1.3066
296	RWG-254	0.885057	0	0.377698	2.33739	0.427827	0.0256889		1.40967
297	RWG-255	0.424242	0	0.176166	2.25546	0.443368	0.0356025		1.26243
298	RWG-256	0.928571	0	0.446914	2.09003	0.478462	0.0474286		1.42117
299	RWG-257	0.608696	0	0.34	1.88506	0.530488	0.0392766		1.28634
300	RWG-258	0.747126	0	0.282143	2.7153	0.368283	0.0409438		1.35848
301	RWG-259	0.405797	0	0.150877	2.43779	0.410208	0.0432881		1.24531
302	RWG-260	0.766667	0	0.303955	2.6461	0.377915	0.0363168		1.38565
303	RWG-261	0.973333	0	0.414667	2.49315	0.401099	0.0440143		1.42442
304	RWG-262	0.633333	0	0.226437	2.83991	0.352124	0.0191179		1.41247
305	RWG-263	0.954023	0	0.45731	2.11968	0.47177	0.0330449		1.46205
306	RWG-264	0.42029	0	0.188333	2.16964	0.460906	0.0190335		1.37389
307	RWG-265	0.701149	0	0.284211	2.58834	0.386348	0.0193739		1.51827
308	RWG-266	0.766667	0	0.31	2.63768	0.379121	0.0286809		1.34262
309	RWG-267	0.977778	0.0111111	0.481111	2.07955	0.480874	0.0186921		1.40338
310	RWG-268	0.931034	0.0229885	0.382759	2.65021	0.377329	0.0251538		1.34405
311	RWG-269	0.885057	0	0.384524	2.37313	0.421384	0.0242227		1.37426
312	RWG-270	0.965517	0.0114943	0.451724	2.24206	0.446018	0.0229331		1.34246
313	RWG-271	0.9	0.122222	0.511111	1.8642	0.536424	0.0210295		1.30728
314	RWG-273	0.954023	0.0114943	0.468966	2.08434	0.479769	0.0336508		1.48407
315	RWG-274	1.01235	0	0.451852	2.35772	0.424138	0.0704267		1.50103
316	RWG-275	0.785714	0.0133333	0.358491	2.24894	0.444654	0.0418809		1.37867
317	RWG-277	0.873563	0	0.392857	2.28127	0.438353	0.0362285		1.31948
318	RWG-278	0.724638	0	0.334975	2.04909	0.488021	0.0212261		1.44901
319	RWG-279	1.02381	0.0238095	0.497619	2.14729	0.465704	0.0208154		1.42391
320	RWG-280	0.988506	0.0666667	0.549383	1.77461	0.563505	0.0238818		1.33458
321	RWG-281	0.91954	0	0.448276	2.08333	0.48	0.0229133		1.54118
322	RWG-282	0.857143	0.0246914	0.424242	2.08301	0.480074	0.022168		1.47796
323	RWG-283	1.01333	0.0972222	0.556463	1.88512	0.53047	0.0197768		1.44801
324	RWG-284	0.885057	0.0123457	0.460714	1.92294	0.520037	0.0319428		1.42245
325	RWG-285	0.690476	0	0.305128	2.27299	0.439949	0.0181779		1.35624
326	RWG-286	0.701149	0	0.237427	3.01093	0.332123	0.022177		1.39291
327	RWG-287	0.896552	0.344828	0.613793	1.66667	0.6	0.0240919		1.5884
328	RWG-288	0.942529	0.103448	0.518391	1.92276	0.520085	0.0180815		1.46309
329	RWG-289	1.02381	0.0833333	0.544048	1.98062	0.504892	0.0307584		1.61866
330	RWG-290	0.988506	0.214286	0.607774	1.68605	0.593103	0.0339868		1.53002
331	RWG-291	0.851852	0.0512821	0.401258	2.30124	0.434548	0.0229214		1.42736
332	RWG-293	1.05128	0.24359	0.660256	1.77381	0.563758	0.0387363		1.49989
333	RWG-294	0.922222	0.0555556	0.48	2.00402	0.498998	0.0356964		1.45172
334	RWG-298	0.655172	0	0.309942	2.15945	0.46308	0.0164108		1.35273
335	RWG-316	0.869048	0.0357143	0.445238	2.0137	0.496599	0.0731968		1.33379
336	RWG-317	0.92	0	0.491304	1.77411	0.563662	0.0224566		1.4014
337	RWG-318	0.797619	0	0.377381	2.1791	0.458904	0.0193892		1.32651
338	RWG-319	1.02899	0	0.527387	1.82515	0.547901	0.0257418		1.33754
339	RWG-320	0.822222	0	0.409195	1.99324	0.501695	0.0189577		1.55086
340	RWG-321	0.952381	0	0.488889	1.89778	0.526932	0.0242127		1.32779
341	RWG-322	0.977011	0.0114943	0.487356	2.03529	0.491329	0.0286465		1.30956
342	RWG-323	0.633333	0	0.261111	2.5848	0.386878	0.0230194		1.32672
343	RWG-324	0	0	0					1.22147
344	RWG-325	0.689655	0	0.236782	3.04444	0.328467	0.0291829		1.46288
345	RWG-326	0.92	0	0.433333	2.19324	0.455947	0.0241453		1.42105
346	RWG-327	0.45679	0.0144928	0.186667	2.50305	0.399512	0.0442062		1.51937
347	RWG-328	0.925926	0.0133333	0.474359	1.93241	0.517488	0.030108		1.55333
348	RWG-329	0.904762	0.0238095	0.452381	2.0614	0.485106	0.0395269		1.32631
349	RWG-330	0.613333	0	0.272727	2.05425	0.486796			1.41718
350	RWG-331	0.761905	0	0.32381	2.5	0.4	0.03161		1.56845
351	RWG-334	1.04167	0.0416667	0.522222	2.08444	0.479744	0.0220708		1.65217
352	RWG-335	0.988095	0.0238095	0.503571	1.99197	0.502016	0.0242878		1.5208
353	RWG-336	0.877778	0	0.398889	2.3038	0.434066	0.0305704		1.44505
354	RWG-337	0.567901	0	0.193711	2.99068	0.334372			1.30583
355	RWG-338	0.615385	0	0.261538	2.5	0.4	0.0146875		1.21183
356	RWG-339	0.298851	0	0.104762	2.87841	0.347414	0.017783		1.28286
357	RWG-340	0.892857	0	0.439286	2.05333	0.487013	0.0320967		1.31779
358	RWG-341	0.0357143	0	0.0184049	1.78344	0.560714	0.0227946		1.22331
359	RWG-342	0.869048	0	0.388889	2.29285	0.436139	0.0223618		1.35262
360	RWG-343	0.83908	0	0.347436	2.36843	0.422221	0.0286611		1.21191
361	RWG-344	0.367816	0	0.149333	2.35135	0.425287	0.021471		1.28249
362	RWG-345	0.790123	0	0.388889	2.10256	0.47561	0.0216074		1.31773
363	RWG-346	0.259259	0	0.106918	2.54082	0.393574	0.0256396		1.35557
364	RWG-347	0.604938	0.0133333	0.241026	2.62843	0.380455	0.0166722		1.309
365	RWG-348	0.933333	0.0111111	0.452222	2.13095	0.469274	0.0204609		1.31956
366	RWG-349	0.888889	0.0864198	0.475309	1.99537	0.50116	0.0397068		1.25983
367	RWG-350	0.975309	0.0246914	0.480247	2.1097	0.474	0.0351639		1.34027
368	RWG-351	0.5	0.0277778	0.214667	2.50794	0.398734	0.0332056		1.3949
369	RWG-352	0.0246914	0	0.0125	1.83673	0.544444			1.26841
370	RWG-353	0.758621	0	0.345771	2.13298	0.468828	0.023725		1.35135
371	RWG-354	0.77381	0.0123457	0.378182	2.09443	0.477457	0.0294741		1.38047
372	RWG-355	0.928571	0.0123457	0.44	2.18273	0.458142	0.0496469		1.44888
373	RWG-356	0.788889	0	0.322917	2.44225	0.409458	0.0263404		1.47776
374	RWG-357	0.781609	0	0.384906	1.9902	0.502463	0.0857445		1.26755
375	RWG-358	0.896552	0	0.450909	1.95192	0.512315	0.0422838		1.27219
376	RWG-359	0.866667	0.0222222	0.4	2.31624	0.431734	0.0400311		1.65694
377	RWG-360	0.833333	0	0.468182	1.6549	0.604265	0.0133603		1.36604
378	RWG-361	0.261905	0	0.109524	2.54545	0.392857	0.0205671		1.43673
379	RWG-362	0.712644	0	0.349091	2.02688	0.493369	0.0465943		1.28743
380	RWG-363	0.0111111	0	0.00613497	1.71429	0.583333			1.17809
381	RWG-364	0.908046	0	0.44023	2.10127	0.475904	0.0399235		1.32076
382	RWG-365	0.609195	0	0.21697	2.79285	0.358058	0.0367242		1.22672
383	RWG-366	0.794872	0	0.409567	1.8077	0.553188	0.0301097		1.36197
384	RWG-367	0.857143		0.857143	1	1	0.0218459		1.40519
385	RWG-368	0.577778		0.577778	1	1	0.0284689		1.63708
386	RWG-369	0.747126		0.747126	1	1	0.0239976		1.36123
387	RWG-370	0.125		0.125	1	1	0.0211685		1.38782
388	RWG-371	0.144444		0.144444	1	1	0.0197866		1.29948
389	RWG-372	0.816092		0.816092	1	1	0.0248099		1.36168
390	RWG-373	0.642857		0.642857	1	1	0.0318666		1.39137
391	RWG-374	0.045977		0.045977	1	1			1.41049
392	RWG-375	1.08696		1.08696	1	1	0.0375863		1.35936
393	RWG-376	0.261905		0.261905	1	1			1.4878
394	RWG-377	0.62069		0.62069	1	1	0.0199238		1.30577
395	RWG-378	0.7		0.7	1	1	0.0258444		1.25289
396	RWG-379	0.964286		0.964286	1	1	0.0260819		1.29755
397	RWG-380	0.952381		0.952381	1	1	0.0336379		1.32756
398	RWG-381	0.935897		0.935897	1	1	0.0359782		1.28848
399	RWG-382	0.492063		0.492063	1	1	0.021004		1.36027
400	RWG-383	0.238095		0.238095	1	1	0.0179569		1.22712
401	RWG-384	0.0555556		0.0555556	1	1			1.25251
402	RWG-408	0.9	0.130952	0.528736	1.74769	0.572185	0.0309662		1.39839
403	RWG-409	0.833333	0.101449	0.499346	1.67705	0.596284	0.0294415		1.31884
404	RWG-412	0.333333	0.0526316	0.178515	1.88421	0.530726	0.0289996		1.46591
405	RWG-413	0.513889	0.0277778	0.229167	2.48649	0.402174	0.0257739		1.37327
406	RWG-414	0.873563	0.609195	0.747126	1.31169	0.762376	0.0270008		1.24637
407	RWG-418	0.3	0	0.124005	2.45132	0.407944	0.0182654		1.38676
408	RWG-422	0.544444	0	0.239766	2.31293	0.432353	0.0299954		1.21916
409	RWG-423	0.877778	0.0444444	0.454444	2	0.5	0.0152429		1.45643
410	RWG-424	0.869048	0.538462	0.707711	1.32206	0.756393	0.0219563		1.34835
411	RWG-425	0.550725	0.057971	0.205797	3.08772	0.323864	0.0301598		1.41919
412	RWG-428	0.946667	0.213333	0.433333	2.80751	0.356187	0.0313941		1.22212
413	RWG-429	0.962963	0.0493827	0.323457	3.21368	0.31117	0.0273386		1.2445
414	RWG-430	0.928571	0.0512821	0.328321	2.75458	0.363032	0.0195354		1.25669
415	RWG-431	0.966667	0.0777778	0.344444	3.14559	0.317905	0.0251687		1.31567
416	RWG-432	0.705128	0.304348	0.435146	1.92433	0.51966	0.0240099		1.36323
417	RWG-433	0.948718	0.291667	0.5	2.26469	0.441562	0.0167138		1.4475
