# Supplementary material for: Haplotype Analysis of BADH1 by Next-Generation Sequencing Reveals Association with Salt Tolerance in Rice during Domestication
Source: Int J Mol Sci. 2021 Jul 15;22(14):7578. doi: 10.3390/ijms22147578 (PMC8305476; doi:10.3390/ijms22147578)
Supplement: Supplementary file 1 [file ijms-22-07578-s001.zip › Supplementary Table S8A and B. The association results of salt traits.xlsx]

## Sheet: The association results(p<0.05)
Supplementary Table 8A. Association analysis between the recorded data of 8 plant parameters and BADH1 gene region. The associated positions of each parameter were selected at significant level by p<0.05								Supplementary Table 8B. Summary of associated positions for all 8 plant parameters. The number (0 or 1) indicates whether the respective position was existed in association level or not at p<0.05. There were five positions whihc have been published and confirmed for their association of this gene position with plant parameters under salt stress.
Trait	Marker	Chromosome	Position	Marker_F	Marker_P	Marker_R2		Published	Position	rGE	rGI	rGP	rGR	rMGT	rRL	rSL	rTDW	Total
rTDW	4_23174190	4	23174190	51.5643	1.0453e-20	0.20059			4_23171522	0	1	1	1	1	1	1	1	7
rTDW	4_23173401	4	23173401	89.013	2.9419e-19	0.17802			4_23172380	0	1	1	0	0	0	0	1	3
rTDW	4_23175725	4	23175725	45.0756	1.9811e-18	0.17953			4_23172410	1	0	0	0	0	0	1	0	2
rTDW	4_23175444	4	23175444	44.7842	2.5166e-18	0.17858		BADH1.7	4_23172450	1	0	0	0	0	1	0	0	2
rTDW	4_23174850	4	23174850	44.7606	2.5659e-18	0.1785		BADH1.5	4_23172728	0	1	1	0	1	1	1	1	6
rTDW	4_23173030	4	23173030	44.7183	2.7552e-18	0.1798			4_23172810	0	1	1	0	1	1	1	1	6
rTDW	4_23174287	4	23174287	44.6758	2.7761e-18	0.17858			4_23173030		1	1	0	1	1	1	1	6
rTDW	4_23172810	4	23172810	44.1888	4.1802e-18	0.17733			4_23173183	0	1	0	0	0	1	0	0	2
rTDW	4_23174672	4	23174672	44.099	4.4216e-18	0.17633			4_23173224	1	1	1	0	1	1	0	1	6
rTDW	4_23171522	4	23171522	43.9113	5.2065e-18	0.17606			4_23173401	0	1	1	1	1	1	1	1	7
rTDW	4_23172728	4	23172728	43.582	6.8908e-18	0.17532		BADH1.4	4_23173918	0	0	0	0	0	1	0	0	1
rGP	4_23173224	4	23173224	70.4085	7.7427e-16	0.14565			4_23174035	1	1	1	0	0	1	0	1	5
rGP	4_23174607	4	23174607	70.4085	7.7427e-16	0.14565			4_23174190	0	1	1	0	1	1	1	1	6
rGP	4_23174718	4	23174718	70.4085	7.7427e-16	0.14565			4_23174216	0	1	1	0	0	1	0	1	4
rGP	4_23174035	4	23174035	36.0748	3.6788e-15	0.14933			4_23174287	0	1	1	1	1	1	1	1	7
rTDW	4_23173224	4	23173224	61.6189	3.6199e-14	0.12983			4_23174463	1	0	0	1	1	1	0	1	5
rTDW	4_23174607	4	23174607	61.6189	3.6199e-14	0.12983			4_23174607	1	1	1	0	1	1	0	1	6
rTDW	4_23174718	4	23174718	61.6189	3.6199e-14	0.12983			4_23174672	0	1	1	1	1	1	1	1	7
rGP	4_23174190	4	23174190	31.0184	2.8419e-13	0.13115			4_23174718	1	1	1	0	1	1	0	1	6
rTDW	4_23174035	4	23174035	30.8911	3.1743e-13	0.13068		BADH1.3	4_23174850	0	1	1	1	1	1	1	1	7
rGP	4_23173030	4	23173030	26.814	1.1457e-11	0.11617			4_23175444	0	1	1	1	1	1	1	1	7
rGP	4_23173401	4	23173401	48.0919	1.5857e-11	0.10475			4_23175725	0	1	1	0	1	1	1	1	6
rGP	4_23172810	4	23172810	25.4009	3.9838e-11	0.11025			4_23175741	0	1	1	0	0	1	0	1	4
rGP	4_23175725	4	23175725	25.201	4.7289e-11	0.109			4_23175747	0	1	1	0	0	1	0	1	4
rGP	4_23174850	4	23174850	24.6663	7.6196e-11	0.10693			4_23175803	1	0	0	0	0	1	0	1	3
rGP	4_23175444	4	23175444	24.5681	8.318e-11	0.10655		BADH1.2	4_23176152	1	0	0	1	0	0	0	1	3
rGP	4_23172728	4	23172728	24.5001	8.8933e-11	0.10675			4_23176287	1	0	0	1	1	1	0	1	5
rGP	4_23174287	4	23174287	24.4319	9.4232e-11	0.10626
rGP	4_23171522	4	23171522	24.3336	1.0288e-10	0.10587
rGP	4_23174672	4	23174672	23.722	1.7738e-10	0.10326
rRL	4_23174190	4	23174190	19.7427	6.8643e-09	0.0928
rRL	4_23173401	4	23173401	25.0714	8.4188e-07	0.06099
rGI	4_23173224	4	23173224	23.9032	1.4531e-06	0.05471
rGI	4_23174607	4	23174607	23.9032	1.4531e-06	0.05471
rGI	4_23174718	4	23174718	23.9032	1.4531e-06	0.05471
rGI	4_23174035	4	23174035	13.4786	2.1393e-06	0.06155
rRL	4_23173030	4	23173030	13.3686	2.4394e-06	0.0651
rRL	4_23171522	4	23171522	13.1291	3.0422e-06	0.06354
rRL	4_23172810	4	23172810	13.116	3.0863e-06	0.06379
rRL	4_23175725	4	23175725	13.0305	3.3367e-06	0.06309
rRL	4_23172728	4	23172728	12.8137	4.097e-06	0.06241
rRL	4_23175444	4	23175444	12.7951	4.1608e-06	0.06202
rRL	4_23174287	4	23174287	12.7509	4.341e-06	0.06197
rRL	4_23174850	4	23174850	12.7054	4.5258e-06	0.06162
rRL	4_23174672	4	23174672	12.5256	5.3583e-06	0.0608
rTDW	4_23174463	4	23174463	14.412	0.00016888	0.03372
rRL	4_23174216	4	23174216	12.7312	0.00040474	0.03185
rRL	4_23175741	4	23175741	12.6928	0.00041274	0.03168
rRL	4_23175747	4	23175747	12.6928	0.00041274	0.03168
rRL	4_23173224	4	23173224	12.4074	0.00047855	0.03099
rRL	4_23174607	4	23174607	12.4074	0.00047855	0.03099
rRL	4_23174718	4	23174718	12.4074	0.00047855	0.03099
rTDW	4_23176287	4	23176287	7.34576	0.00073759	0.03595
rRL	4_23173183	4	23173183	11.3329	0.00083773	0.02845
rTDW	4_23175803	4	23175803	7.18522	0.00085692	0.03386
rRL	4_23174463	4	23174463	10.7957	0.00111	0.02707
rGI	4_23174190	4	23174190	6.85788	0.00118	0.03229
rRL	4_23173918	4	23173918	10.3753	0.00138	0.02604
rRL	4_23174035	4	23174035	6.32462	0.00198	0.03173
rTDW	4_23176152	4	23176152	6.29773	0.00205	0.03408
rMGT	4_23173401	4	23173401	9.60315	0.00208	0.023
rSL	4_23174190	4	23174190	5.84169	0.00371	0.08131
rGI	4_23173030	4	23173030	5.41985	0.00475	0.02588
rGP	4_23175741	4	23175741	7.7149	0.00573	0.01834
rGP	4_23175747	4	23175747	7.7149	0.00573	0.01834
rGP	4_23174216	4	23174216	7.67319	0.00586	0.01828
rGP	4_23172380	4	23172380	7.64376	0.00595	0.0183
rGI	4_23175741	4	23175741	7.52781	0.00634	0.0179
rGI	4_23175747	4	23175747	7.52781	0.00634	0.0179
rGI	4_23174216	4	23174216	7.50021	0.00644	0.01788
rMGT	4_23171522	4	23171522	5.08201	0.00661	0.02431
rGI	4_23173401	4	23173401	7.35477	0.00697	0.01758
rMGT	4_23174850	4	23174850	5.00711	0.00711	0.0239
rMGT	4_23174672	4	23174672	4.99629	0.00718	0.02385
rMGT	4_23174287	4	23174287	4.87849	0.00806	0.02336
rMGT	4_23175444	4	23175444	4.84676	0.00831	0.02315
rGE	4_23174463	4	23174463	7.03401	0.00835	0.01916
rGI	4_23172810	4	23172810	4.77832	0.00888	0.02278
rMGT	4_23175725	4	23175725	4.61991	0.01037	0.02209
rGI	4_23175725	4	23175725	4.5777	0.01081	0.02174
rMGT	4_23172728	4	23172728	4.52891	0.01134	0.02177
rGE	4_23176287	4	23176287	4.43858	0.0125	0.0253
rSL	4_23172810	4	23172810	4.52651	0.01256	0.06464
rGI	4_23172728	4	23172728	4.41313	0.0127	0.02107
rSL	4_23173030	4	23173030	4.51392	0.01273	0.06494
rMGT	4_23172810	4	23172810	4.32376	0.01386	0.0208
rSL	4_23171522	4	23171522	4.41723	0.01389	0.06229
rSL	4_23175444	4	23175444	4.41723	0.01389	0.06229
rRL	4_23176287	4	23176287	4.31375	0.01406	0.02279
rGR	4_23173401	4	23173401	6.03293	0.01446	0.01457
rSL	4_23174287	4	23174287	4.35306	0.01476	0.06187
rGI	4_23172380	4	23172380	5.91834	0.01541	0.01423
rGI	4_23174850	4	23174850	4.18698	0.01584	0.01992
rTDW	4_23174216	4	23174216	5.72881	0.01714	0.01371
rTDW	4_23175741	4	23175741	5.72479	0.01717	0.01367
rTDW	4_23175747	4	23175747	5.72479	0.01717	0.01367
rGR	4_23176287	4	23176287	4.10453	0.01721	0.02056
rRL	4_23172450	4	23172450	5.66987	0.01774	0.01444
rMGT	4_23173030	4	23173030	4.04911	0.01815	0.0196
rSL	4_23172728	4	23172728	4.13276	0.01818	0.05935
rGE	4_23176152	4	23176152	4.05168	0.01834	0.02588
rSL	4_23174672	4	23174672	4.05324	0.01956	0.05745
rGI	4_23175444	4	23175444	3.97008	0.0196	0.01891
rSL	4_23174850	4	23174850	4.0018	0.02053	0.05676
rGI	4_23174287	4	23174287	3.92105	0.02057	0.01872
rSL	4_23175725	4	23175725	3.98168	0.02092	0.05649
rGE	4_23172410	4	23172410	5.2789	0.02216	0.01449
rGI	4_23171522	4	23171522	3.76941	0.02387	0.01801
rGR	4_23174463	4	23174463	5.04945	0.02516	0.01217
rGI	4_23174672	4	23174672	3.69364	0.02571	0.01761
rGE	4_23173224	4	23173224	4.9745	0.02634	0.01363
rGE	4_23174607	4	23174607	4.9745	0.02634	0.01363
rGE	4_23174718	4	23174718	4.9745	0.02634	0.01363
rTDW	4_23172380	4	23172380	4.96547	0.0264	0.01197
rGE	4_23174035	4	23174035	4.89063	0.02763	0.01344
rMGT	4_23176287	4	23176287	3.60145	0.02819	0.01809
rGE	4_23175803	4	23175803	3.57429	0.02904	0.01958
rRL	4_23175803	4	23175803	3.31175	0.03749	0.01691
rMGT	4_23174190	4	23174190	3.28384	0.03848	0.01584
rSL	4_23173401	4	23173401	4.36864	0.03852	0.03204
rGR	4_23176152	4	23176152	3.28267	0.03867	0.01821
rGE	4_23172450	4	23172450	4.30608	0.03869	0.01185
rMGT	4_23174463	4	23174463	4.26138	0.03962	0.01029
rGR	4_23171522	4	23171522	3.2321	0.04049	0.0156
rSL	4_23172410	4	23172410	4.04939	0.04621	0.02955
rGI	4_23173183	4	23173183	3.92315	0.04829	0.00946
rGR	4_23174672	4	23174672	3.04258	0.04879	0.01466
rGR	4_23174850	4	23174850	3.04259	0.04879	0.01466
rMGT	4_23173224	4	23173224	3.90456	0.04883	0.00943
rMGT	4_23174607	4	23174607	3.90456	0.04883	0.00943
rMGT	4_23174718	4	23174718	3.90456	0.04883	0.00943
rGR	4_23174287	4	23174287	3.02606	0.0496	0.01462
rGR	4_23175444	4	23175444	3.02186	0.0498	0.01456
