# Supplementary material for: Haplotype Analysis of BADH1 by Next-Generation Sequencing Reveals Association with Salt Tolerance in Rice during Domestication
Source: Int J Mol Sci. 2021 Jul 15;22(14):7578. doi: 10.3390/ijms22147578 (PMC8305476; doi:10.3390/ijms22147578)
Supplement: Supplementary file 1 [file ijms-22-07578-s001.zip › Supplementary Table S9A and B. The one-way ANOVA table for eight tested plant parameters based on the classified ecotypes and haplotypes.xlsx]

## Sheet: anova_test
Supplementary Table 9A. The one-way ANOVA table for eight tested plant parameters based on the classified ecotypes							Supplementary Table 9B. The one-way ANOVA table for eight tested plant parameters based on the classified haplotypes
one-way ANOVA test of rGP							one-way ANOVA test of rGP
Variable	DF	Sum of squares	Mean square	F value	P-value		Variable	DF	Sum of squares	Mean square	F value	P-value
Ecotype	5	3.211	0.6421	9.64	0.0000000103***		Haplogroup	4	5.182	1.2955	21.26	0.00000000000000111***
Residuals	409	27.244	0.0666				Residuals	344	20.964	0.0609
one-way ANOVA test of rGE							one-way ANOVA test of rGE
Variable	DF	Sum of squares	Mean square	F value	P-value		Variable	DF	Sum of squares	Mean square	F value	P-value
Ecotype	5	0.249	0.04979	1.364	0.237		Haplogroup	4	0.964	0.24108	8.135	0.00000308***
Residuals	356	12.993	0.0365				Residuals	298	8.832	0.02964
one-way ANOVA test of rGI							one-way ANOVA test of rGI
Variable	DF	Sum of squares	Mean square	F value	P-value		Variable	DF	Sum of squares	Mean square	F value	P-value
Ecotype	5	0.446	0.0892	2.047	0.0712.		Haplogroup	4	1.283	0.3207	7.686	0.00000609***
Residuals	409	17.82	0.04357				Residuals	344	14.353	0.0417
one-way ANOVA test of rMGT							one-way ANOVA test of rMGT
Variable	DF	Sum of squares	Mean square	F value	P-value		Variable	DF	Sum of squares	Mean square	F value	P-value
Ecotype	5	1.73	0.3468	1.382	0.23		Haplogroup	4	2.36	0.5904	2.24	0.0644.
Residuals	406	101.89	0.251				Residuals	341	89.87	0.2636
one-way ANOVA test of rGR							one-way ANOVA test of rGR
Variable	DF	Sum of squares	Mean square	F value	P-value		Variable	DF	Sum of squares	Mean square	F value	P-value
Ecotype	5	0.105	0.02094	0.716	0.612		Haplogroup	4	0.226	0.05654	1.799	0.129
Residuals	406	11.876	0.02925				Residuals	341	10.719	0.03143
one-way ANOVA test of rRL							one-way ANOVA test of rRL
Variable	DF	Sum of squares	Mean square	F value	P-value		Variable	DF	Sum of squares	Mean square	F value	P-value
Ecotype	5	0.0338	0.006754	7.146	0.00000208***		Haplogroup	4	0.03443	0.008608	17.05	0.00000000000107***
Residuals	384	0.363	0.000945				Residuals	323	0.16309	0.000505
one-way ANOVA test of rSL							one-way ANOVA test of rSL
Variable	DF	Sum of squares	Mean square	F value	P-value		Variable	DF	Sum of squares	Mean square	F value	P-value
Ecotype	5	0.083	0.016599	4.018	0.00201**		Haplogroup	4	0.1139	0.028484	7.991	0.0000155***
Residuals	130	0.537	0.004131				Residuals	87	0.3101	0.003564
one-way ANOVA test of rTDW							one-way ANOVA test of rTDW
Variable	DF	Sum of squares	Mean square	F value	P-value		Variable	DF	Sum of squares	Mean square	F value	P-value
Ecotype	5	1.242	0.24843	25.86	<2e-16***		Haplogroup	4	0.946	0.23648	23.35	<2e-16***
Residuals	409	3.929	0.00961				Residuals	344	3.484	0.01013
